# Supplementary material
Source: publisher figshare collection journal article supplement (https://acs.figshare.com/ndownloader/files/5575202)

# Sterically Encumbered Tetraarylimidazolium Carbenes Pd-PEPPSI Complexes: Highly Efficient Direct Arylation of Imidazoles with Aryl Bromides under Aerobic Conditions

*Xu-Xian He,<sup>†</sup> Yinwu Li,<sup>‡</sup> Bei-Bei Ma,<sup>†</sup> Zhuofeng Ke,<sup>\*,‡</sup> and Feng-Shou Liu<sup>\*,†</sup>*

*<sup>†</sup>School of Chemistry and Chemical Engineering, Guangdong Pharmaceutical University, Zhongshan, Guangdong, 528458, China*

*<sup>‡</sup>MOE Key Laboratory of Bioinorganic and Synthetic Chemistry, School of Materials Science and Engineering, Sun Yat-sen University, Guangzhou 510275, China*

Correspondence authors: Zhuofeng Ke, E-mail: kezhf3@mail.sysu.edu.cn; Feng-Shou Liu, E-mail: fengshou2004@126.com.

## Content of Supporting Information

|                                                                          |     |
|--------------------------------------------------------------------------|-----|
| 1. Crystal structures and optimized structures by DFT calculations ..... | S2  |
| 2. Procedure of mechanism experiments .....                              | S3  |
| 3. NMR spectrums of the $\alpha$ -diimine compound .....                 | S7  |
| 4. NMR spectrums of the imidazolium salts .....                          | S9  |
| 5. NMR spectrums of the Pd-PEPPSI complexes .....                        | S12 |
| 6. NMR spectrums of the arylated cross-coupling products .....           | S18 |

**Table S1.** Selected distances [Å] and angles [°] for the crystal structures and optimized structures of **C1**, **C2**, and **GADKIH**.

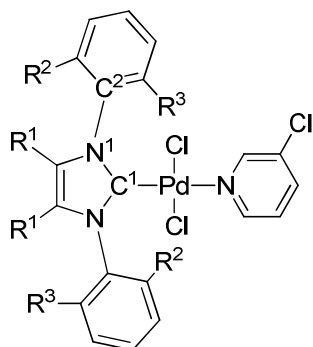

C1:  $R^1 = \text{Ph}$ ,  $R^2 = \text{Me}$ ,  $R^3 = \text{Me}$

C2:  $R^1 = \text{Ph}$ ,  $R^2 = \text{Et}$ ,  $R^3 = \text{Et}$

GADKIH:  $R^1 = H$ ,  $R^2 = Et$ ,  $R^3 = Et$

| <b>C1</b>     | Crystal structure | DFT Optimized Structure |
|---------------|-------------------|-------------------------|
| d(Pd1-C29)    | 1.957             | 1.967                   |
| ∠Pd1-C29-N1   | 125.0             | 127.0                   |
| ∠C29-N1-C1    | 123.0             | 123.0                   |
| <b>C2</b>     |                   |                         |
| d(Pd1-C16)    | 1.979             | 1.993                   |
| ∠Pd1-C16-N1   | 127.2             | 127.3                   |
| ∠C29-N1-C1    | 124.3             | 124.3                   |
| <b>GADKIH</b> |                   |                         |
| d(Pd1-C16)    | 1.971             | 1.987                   |
| ∠Pd1-C16-N1   | 128.4             | 127.7                   |
| ∠C29-N1-C1    | 126.9             | 126.9                   |

### Procedure of mechanism experiments

The capture by oxidant experiment was carried out in flask equipped with a magnetic stirrer. **C3** (0.01 mmol), phenyl bromide (1.0 mmol), 1-methyl-1*H*-imidazole (1.0 mmol), K<sub>2</sub>CO<sub>3</sub> (2.0 mmol), PivOH (0.3 mmol) and 3 mL of DMAc were added into the reactor. The reaction mixture was carried out at 130 °C for 12 h in the presence of 1 atm of oxygen or 2 equiv of Cu(OAc)<sub>2</sub> or 1 equiv of TEMPO. The treatment of the mixture was according to the standard direct arylation.

One-pot competition study on 2-chlorothiophene and 2-methylthiophene with phenyl bromides was performed. **C3** (0.01 mmol), phenyl bromide (1.0 mmol), 2-chlorothiophene (1.0 mmol), 2-methylthiophene (1.0 mmol), K<sub>2</sub>CO<sub>3</sub> (2.0 mmol), PivOH (0.3 mmol) and 3 mL of DMAc were added to a flask and the reaction was heated to 130 °C for 7 min. When reaching the setting time, 20 mL of water was added. The mixture was diluted with Et<sub>2</sub>O (5 mL), followed by extraction three times (3 × 5 mL) with Et<sub>2</sub>O and the added. The resulting mixture was analyzed by GC-MS with the (trifluoromethyl)benzene as internal standard.

### Mechanism discussion

We were then interested to gain some insights into the possible mechanism. The direct reaction between 1-methyl-1*H*-imidazole (**7a**) and 1-bromo-4-chlorobenzene (**8a**) in the presence of 1 equiv of 2,2,6,6-tetramethylpiperidine 1-oxyl (TEMPO) as radical scavenger was performed. The GC yields of **9aa** were obtained in 86%, which

ruled out the possibility of radical process in the arylation.<sup>S1</sup> The Heck-type mechanism seems like impossible, because its involving of insertion and  $\beta$ -H elimination pathway would favor the generation of C4-arylation product.<sup>S2</sup> On the other hand, the reaction was carried out in the presence of 1 atm of oxygen as oxidant, which delivered a much less efficiency of 19% GC yield. Moreover, none arylated product was found when strong oxidant of  $\text{Cu}(\text{OAc})_2$  was used. These results suggest the  $\text{Pd}(0)$  would be captured by the strong oxidant, which impeded the arylation reaction.

To provide additional evidence for this process or not, a one-pot competition experiment performed with an equimolar mixture of 2-chlorothiophene and 2-methylthiophene was conducted. The experiment showed that arylation of the more electron deficient 2-chlorothiophene was favored over the more nucleophilic 2-methylthiophene in a 4.4:1 ratio (**Scheme S1**). This outcome excludes a competitive  $\text{S}_{\text{E}}\text{Ar}$  pathway<sup>3</sup> but supported the CMD mechanism for which arylation of the electron deficient substrate was favored.<sup>S3</sup>

**Scheme S1.** One-Pot Competition Study

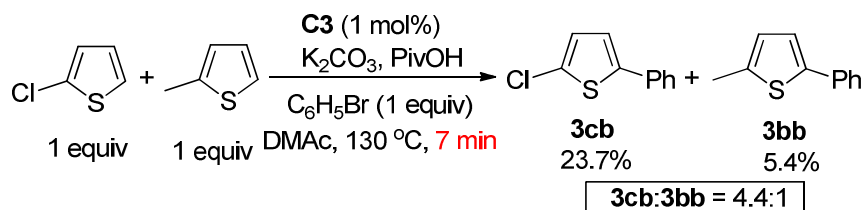

Considered the result obtained above as well as the indispensable role of the  $\text{PivOH}$  for the cross-coupling reaction, a concerted metalation deprotonation (CMD)

pathway would occur in the catalytic process(**Scheme S2**), which is in accordance with the Pd-catalyzed C-H functionalization arylation by Fagnou and our previous investigations.<sup>S4, S5</sup>

**Scheme S2.** Proposed Catalytic Cycle for Pd-PEPPSI Catalyzed Direct Arylation of Imidazoles with Aryl Bromides

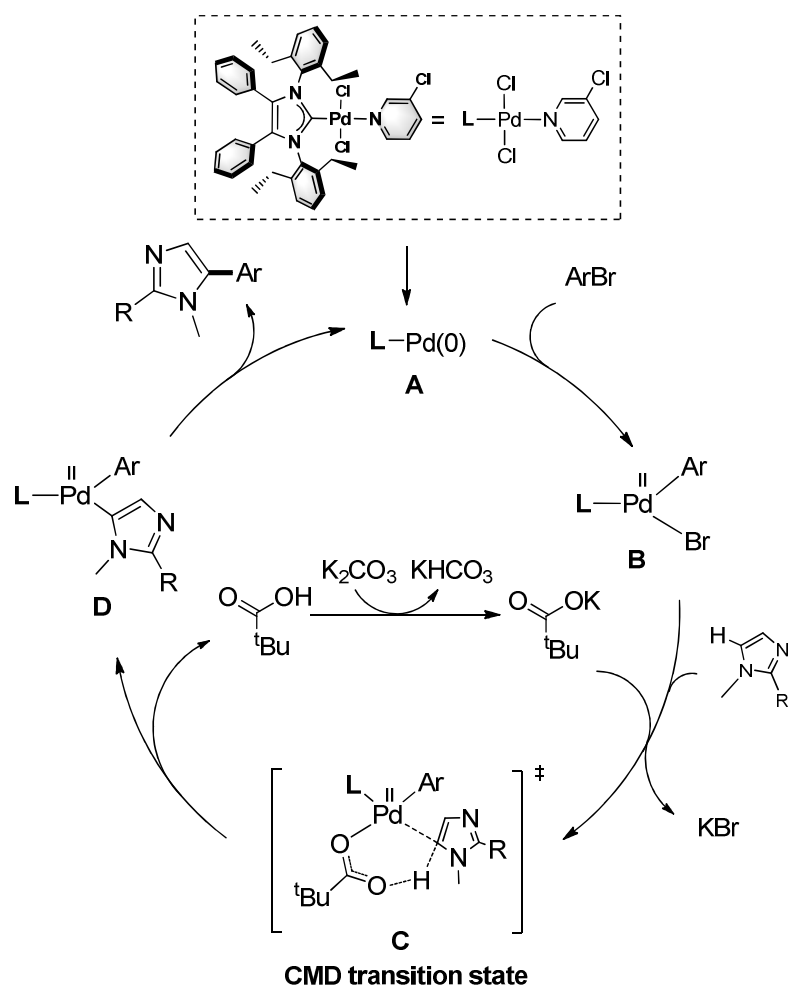

## REFERENCES

- (S1) Neufeldt, S. R.; Sanford, M. S. *Adv. Synth. Catal.* **2012**, 354, 3517-3522.
- (S2) Kirchberg, S.; Kirika, S. T.; Ueda, K.; Yamaguchi, J.; Studer, A. Itami, K. *Angew.*

*Chem. Int. Ed.* **2011**, *50*, 2387-2391.

- (S3) (a) Pivsa-Art, S.; Satoh, T.; Kawamura, Y.; Miura, M.; Nomura, M. *Bull. Chem. Soc. Jpn.* **1998**, *71*, 467-473. (b) Sezen, B.; Sames, D. *J. Am. Chem. Soc.* **2003**, *125*, 5274-5275. (c) Li, W.; Nelson, D. P.; Jensen, M. S.; Hoerner, R. S.; Javadi, G. J.; Cai, D.; Larsen, R. D. *Org. Lett.* **2003**, *5*, 4835-4837. (d) Park, C.-H.; Ryabova, V.; Sergin, I.V.; Sromek, A. W.; Gevorgyan, V. *Org. Lett.* **2004**, *6*, 1159-1162. (e) Lane, B. S.; Brown, M. A.; Sames, D. *J. Am. Chem. Soc.* **2005**, *127*, 8050-8057.
- (S4) Gorelsky, S. I.; Lapointe, D.; Fagnou, K. *J. Org. Chem.* **2012**, *77*, 658-668.
- (S5) Luo, B.-T.; Liu, H.; Lin, Z.-J.; Jiang, J.; Shen, D.-S.; Liu, R.-Z.; Ke, Z.; Liu, F.-S. *Organometallics* **2015**, *34*, 4881-4894.

Figure S1. The NMR spectra of the  $\alpha$ -diimine compound of **1**.

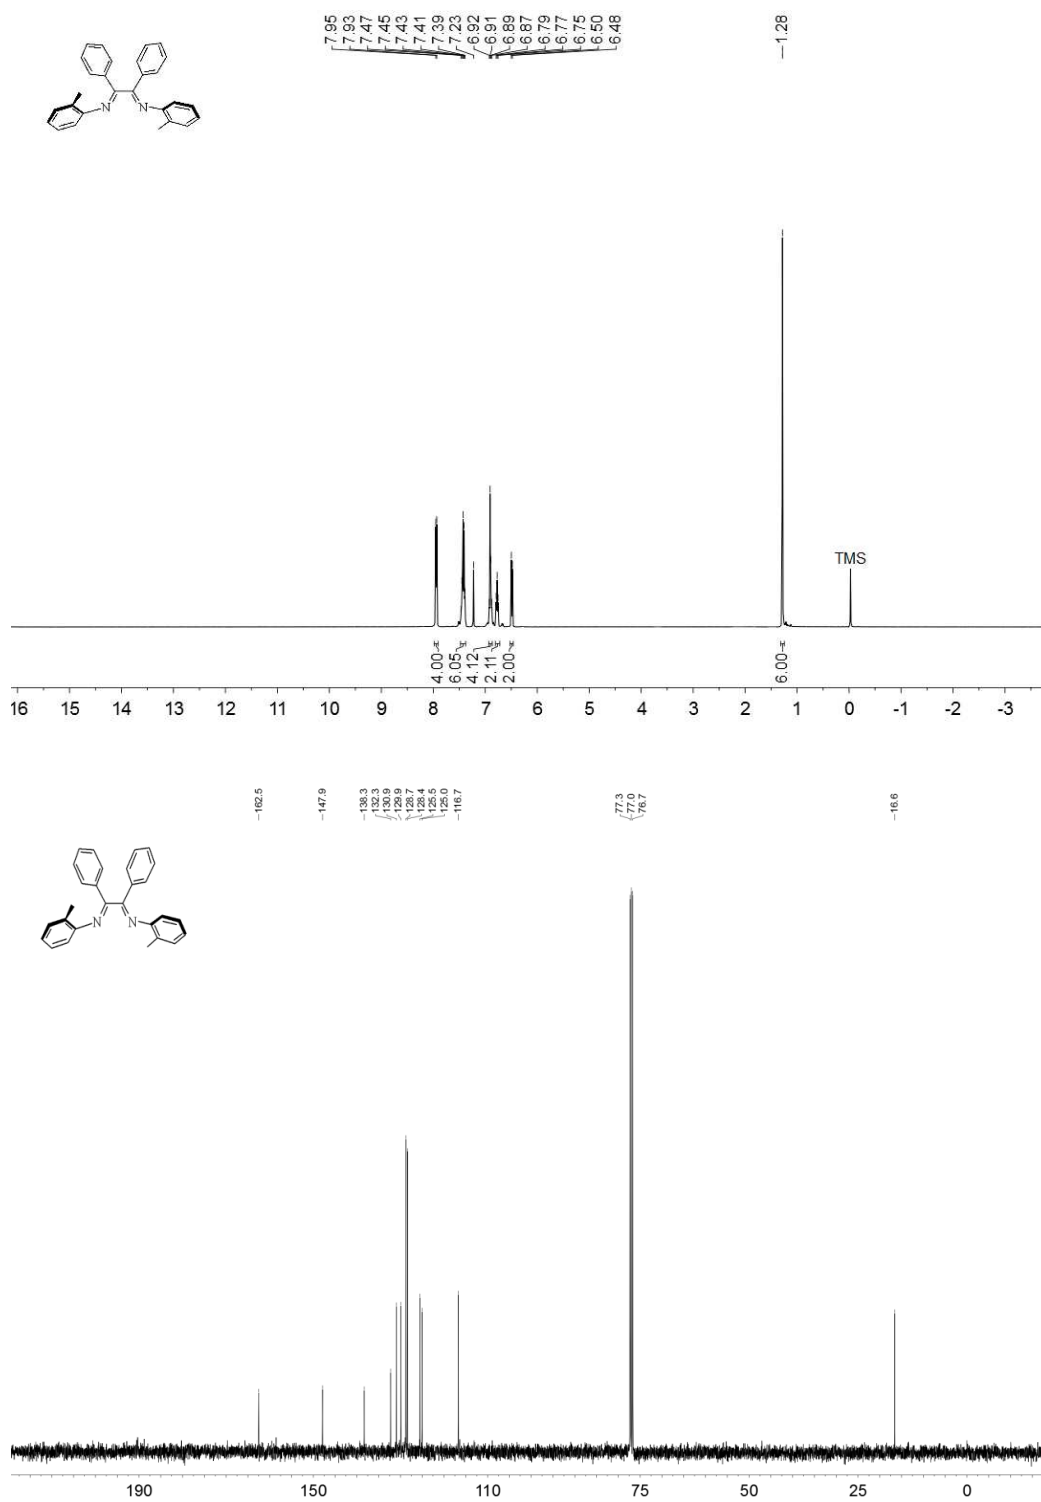

Figure S2. The NMR spectra of the  $\alpha$ -diimine compound of **3**.

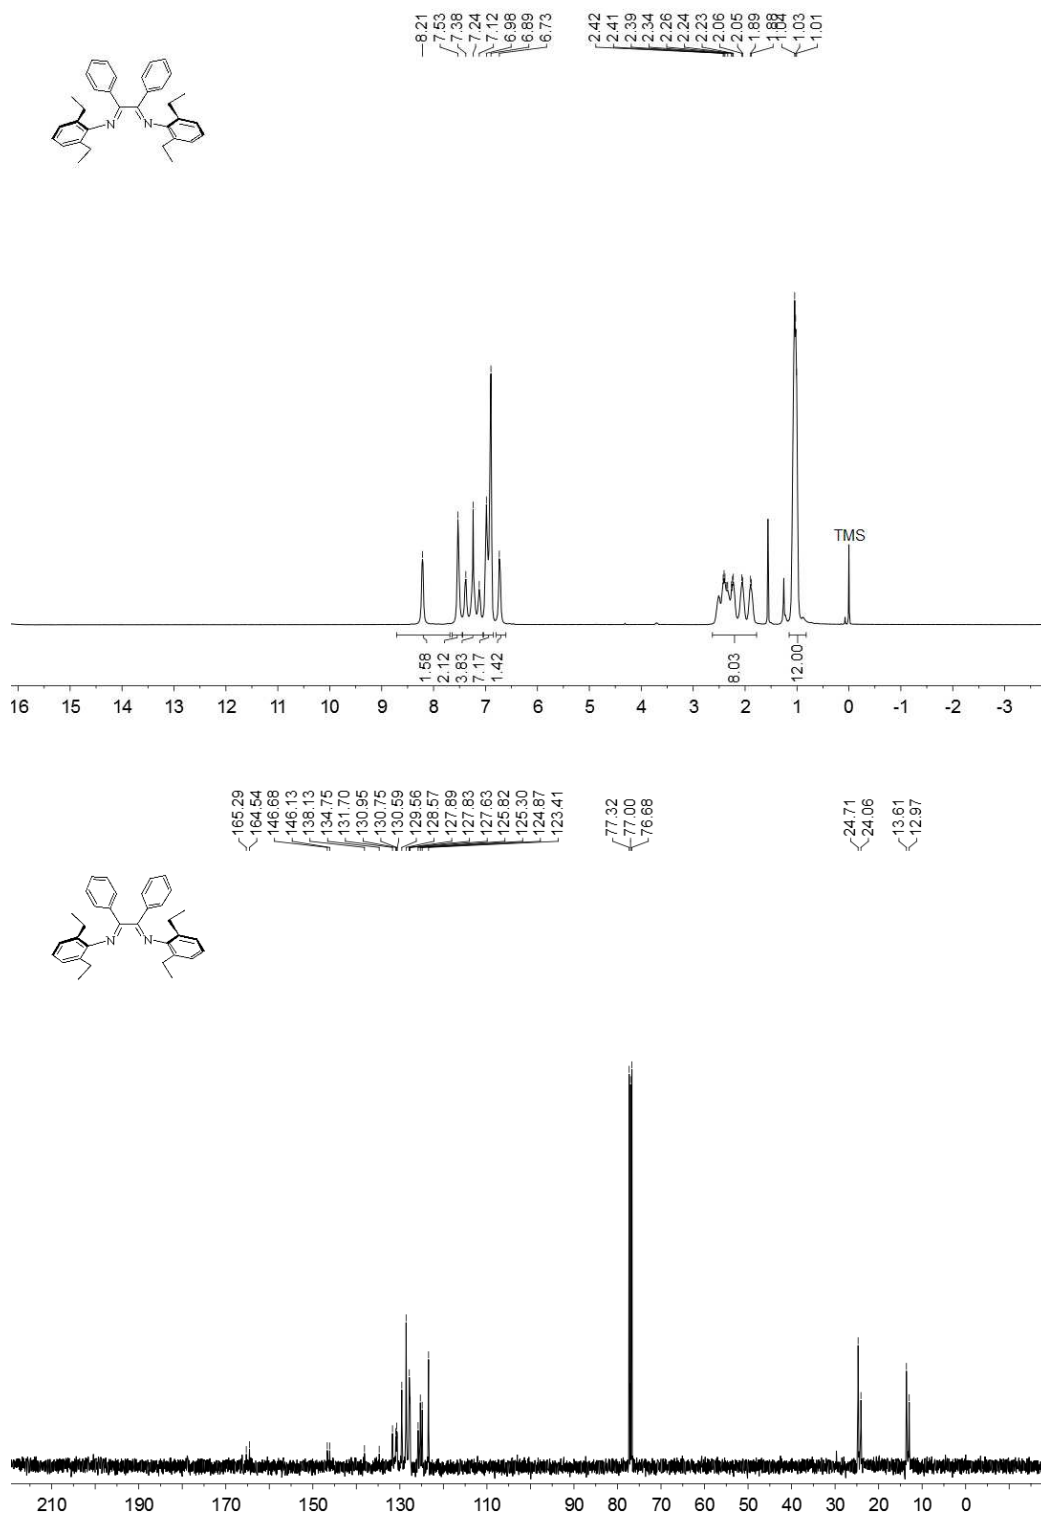



Figure S3. The NMR spectra of the imidazolium salts compound of **L1**.

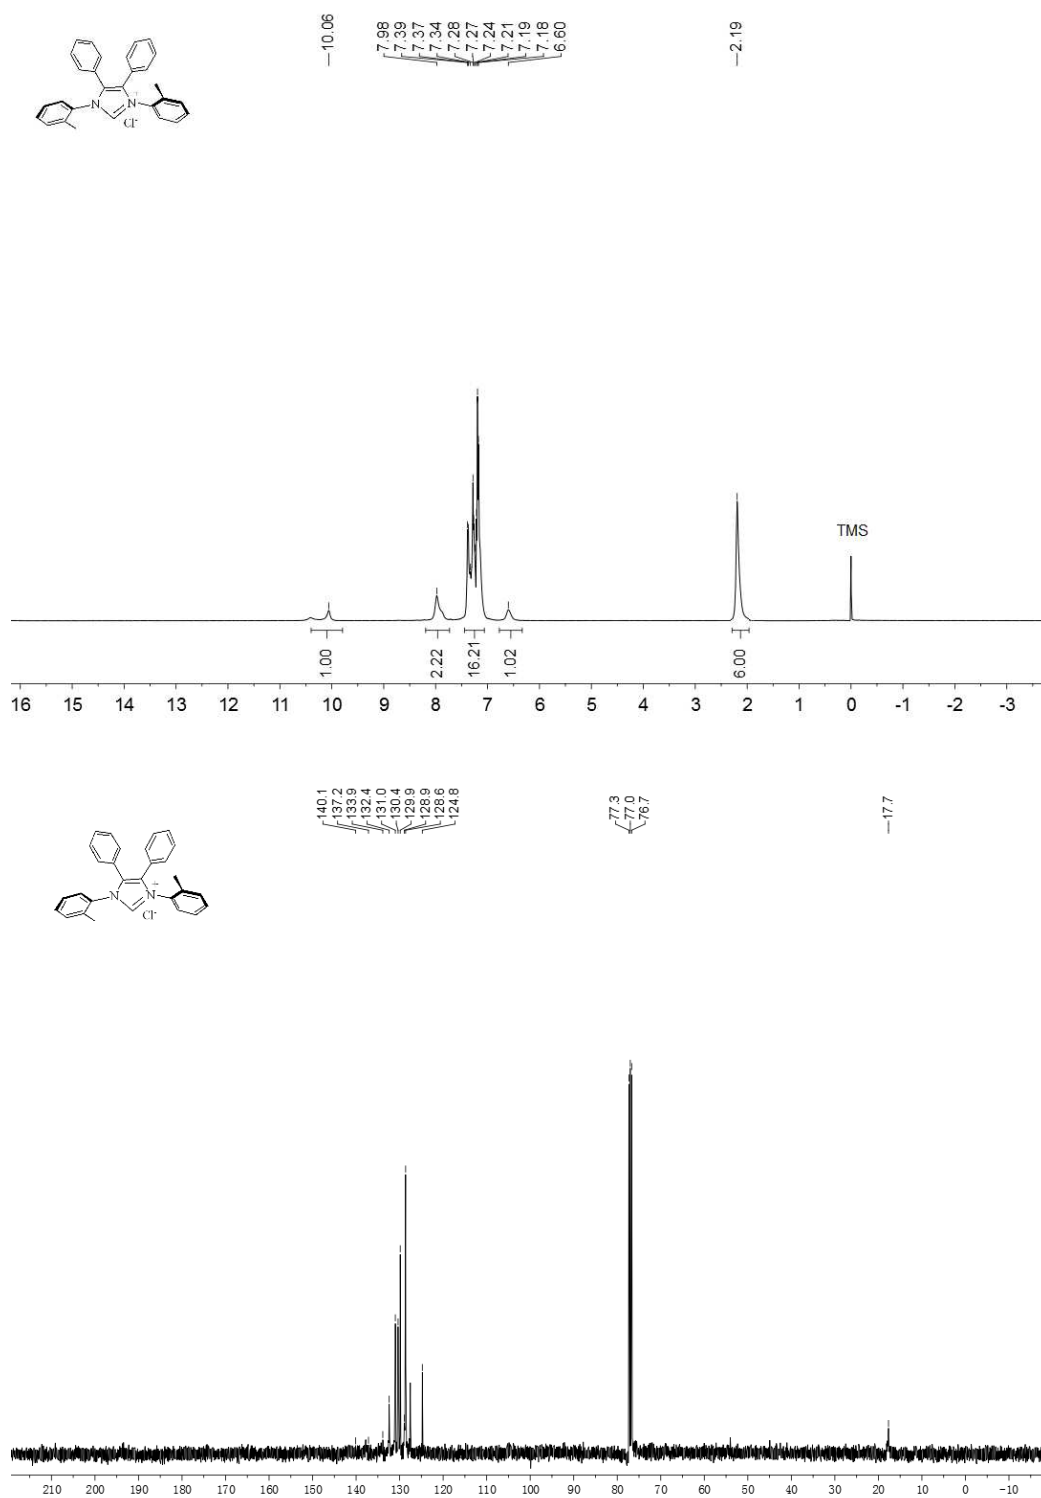

Figure S4. The NMR spectra of the imidazolium salts compound of L2.

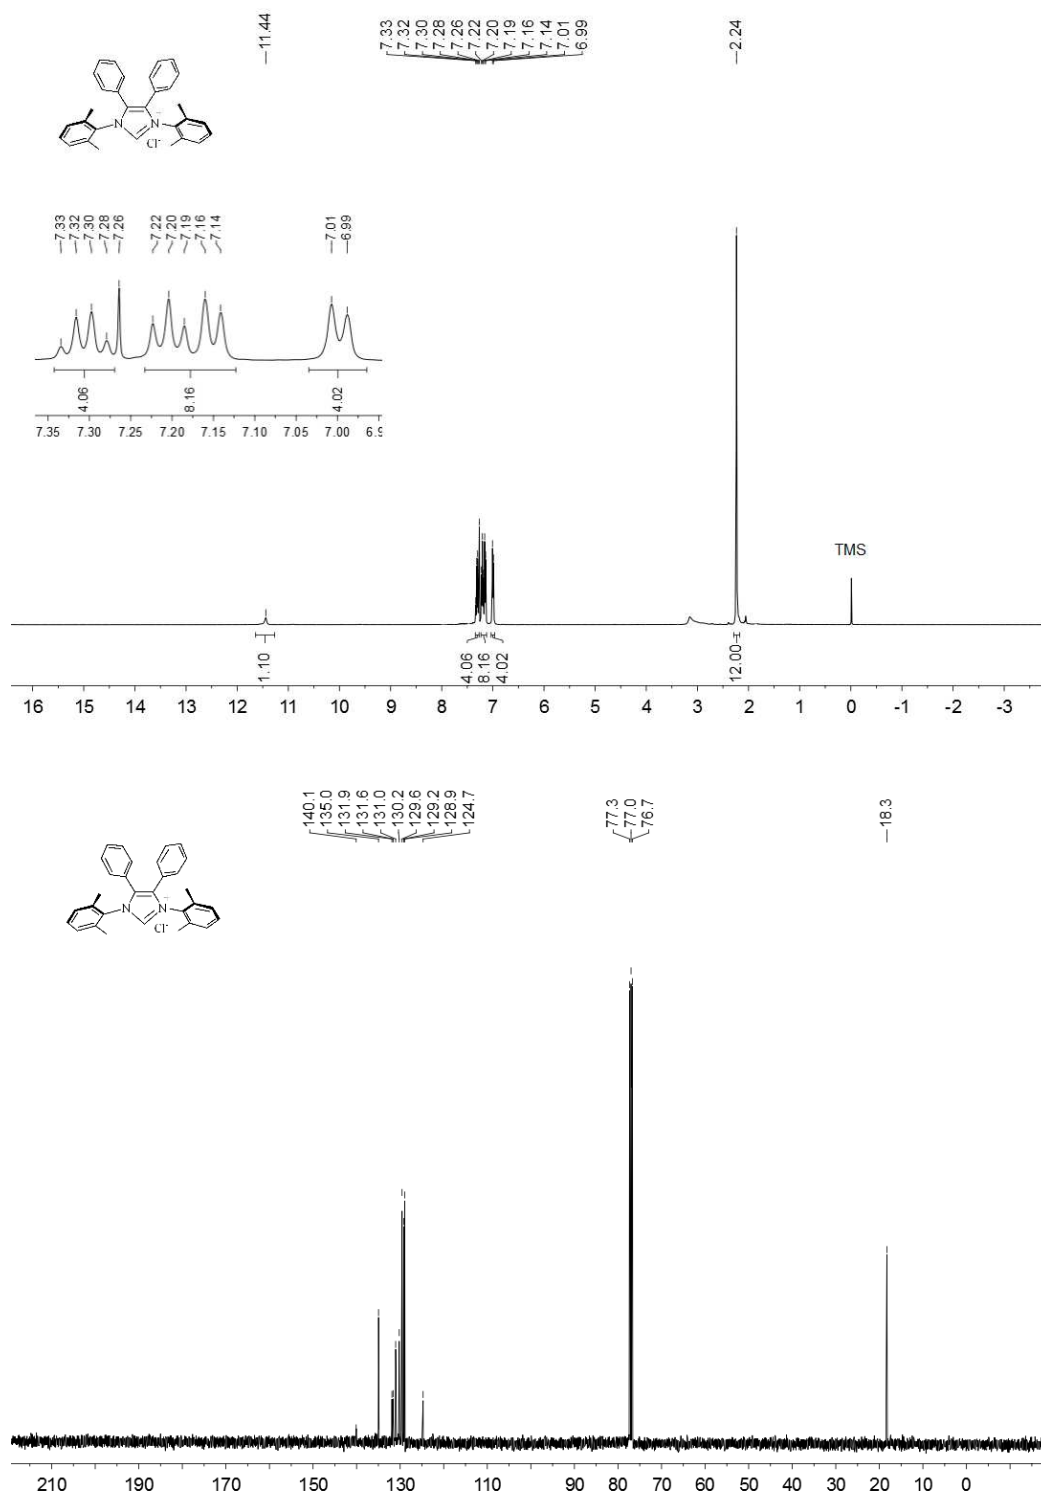

Figure S5. The NMR spectra of the imidazolium salts compound of **L3**.

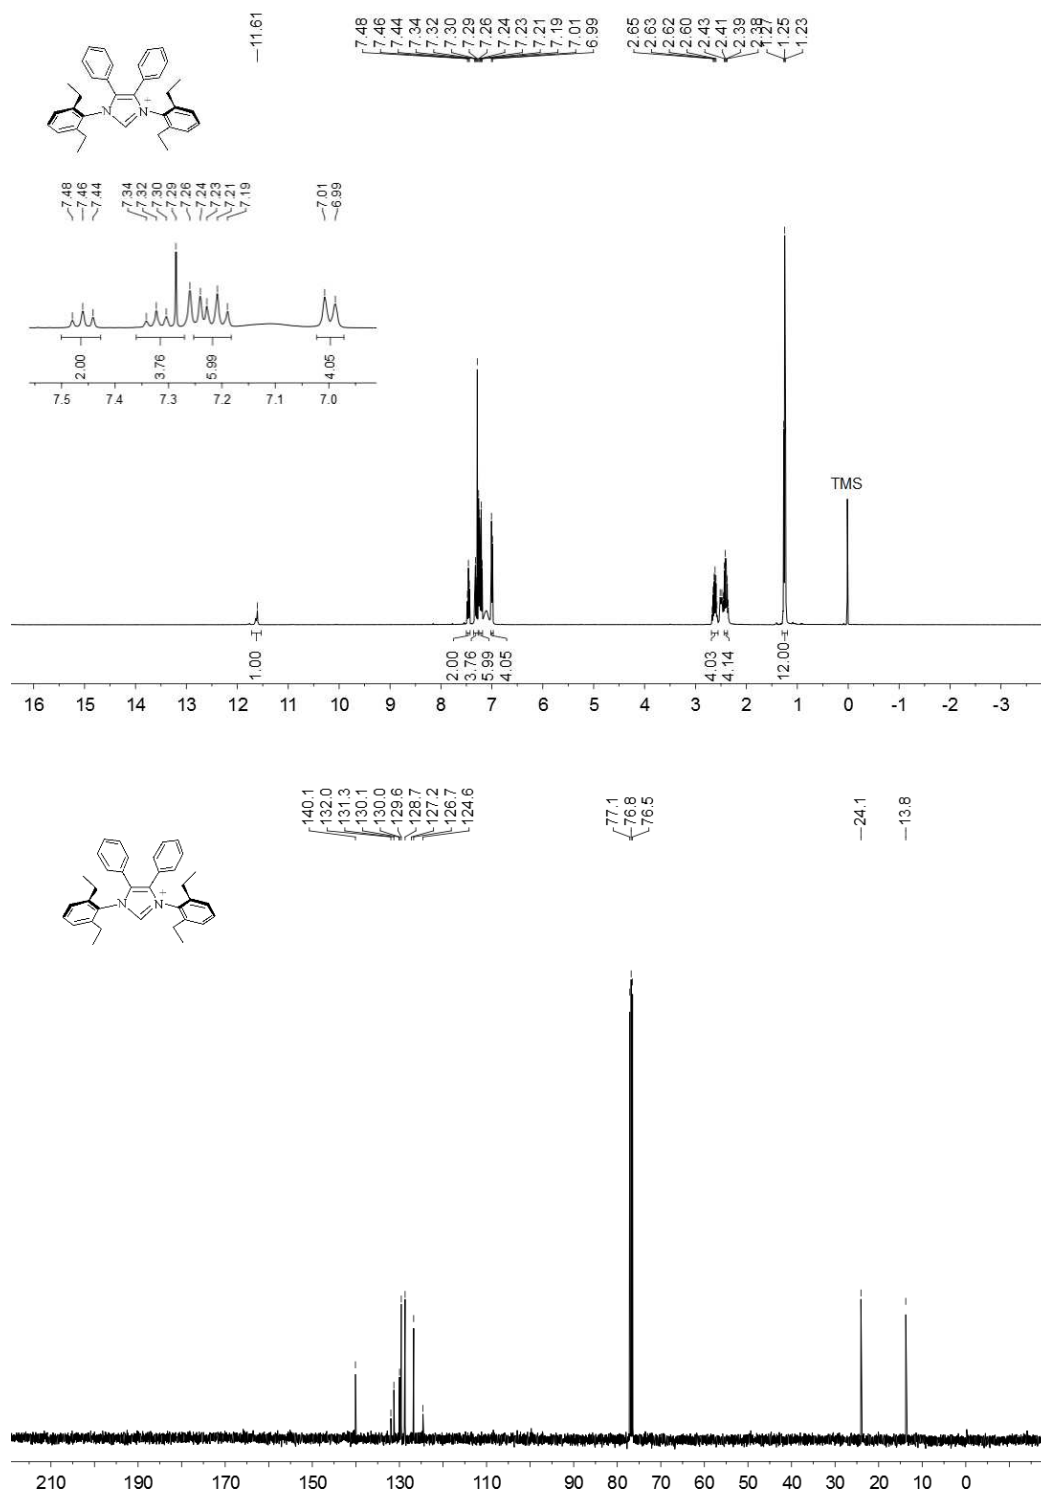

Figure S6. The NMR spectra of the Pd-PEPPSI complex of C1.

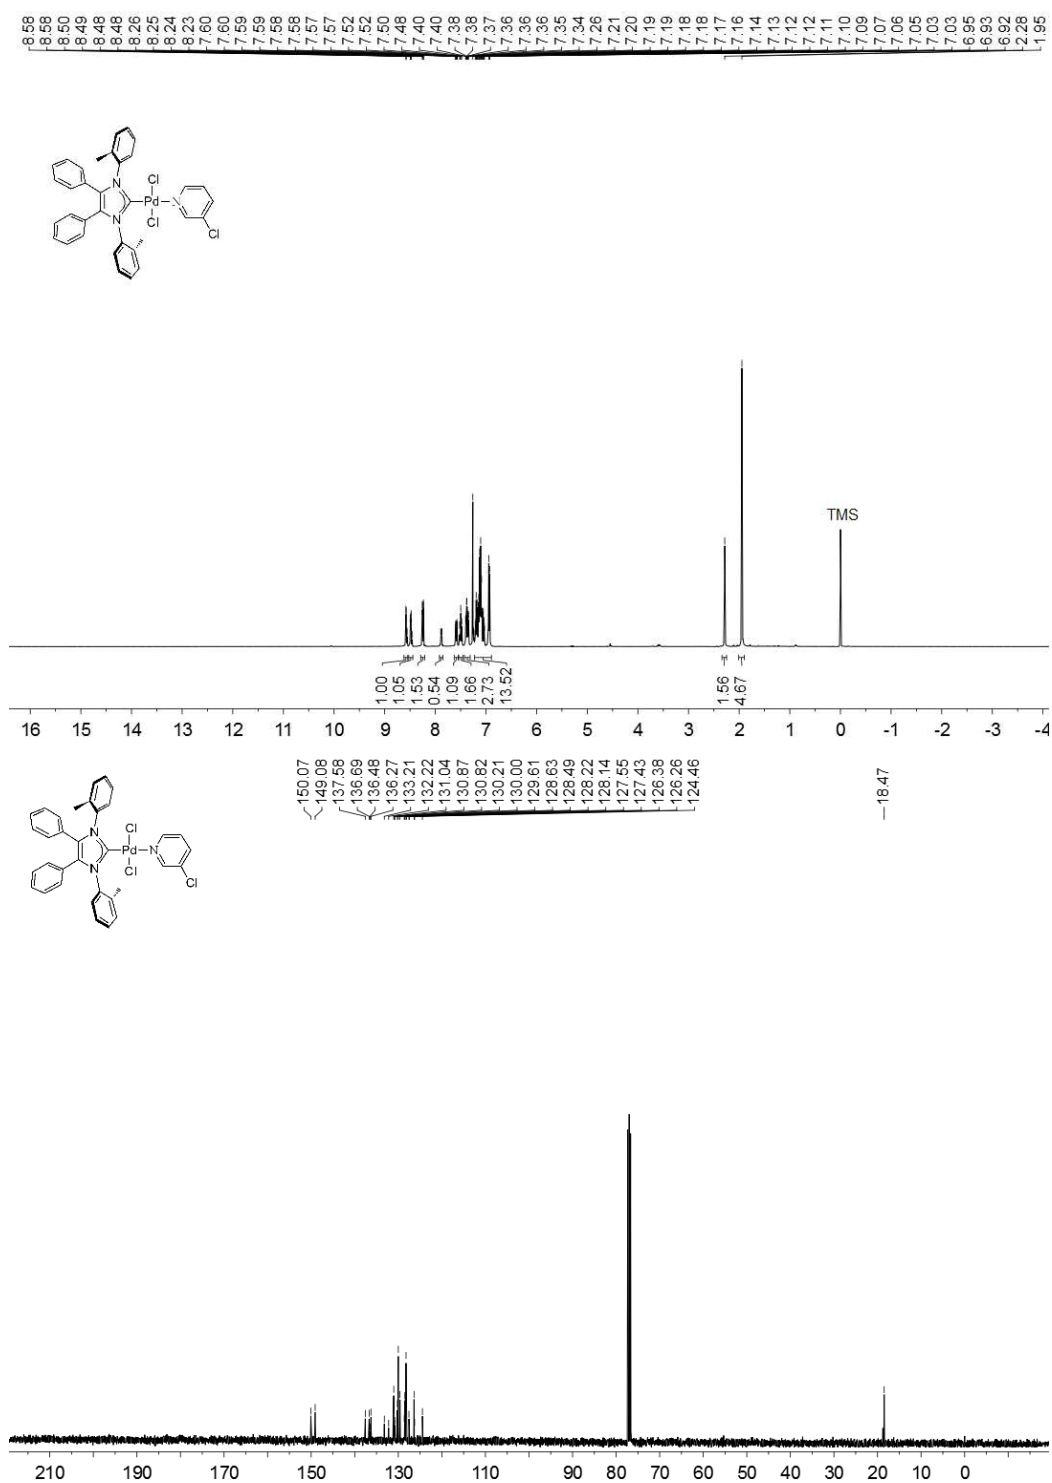

Figure S7. The NMR spectra of the Pd-PEPPSI complex of **C2**.

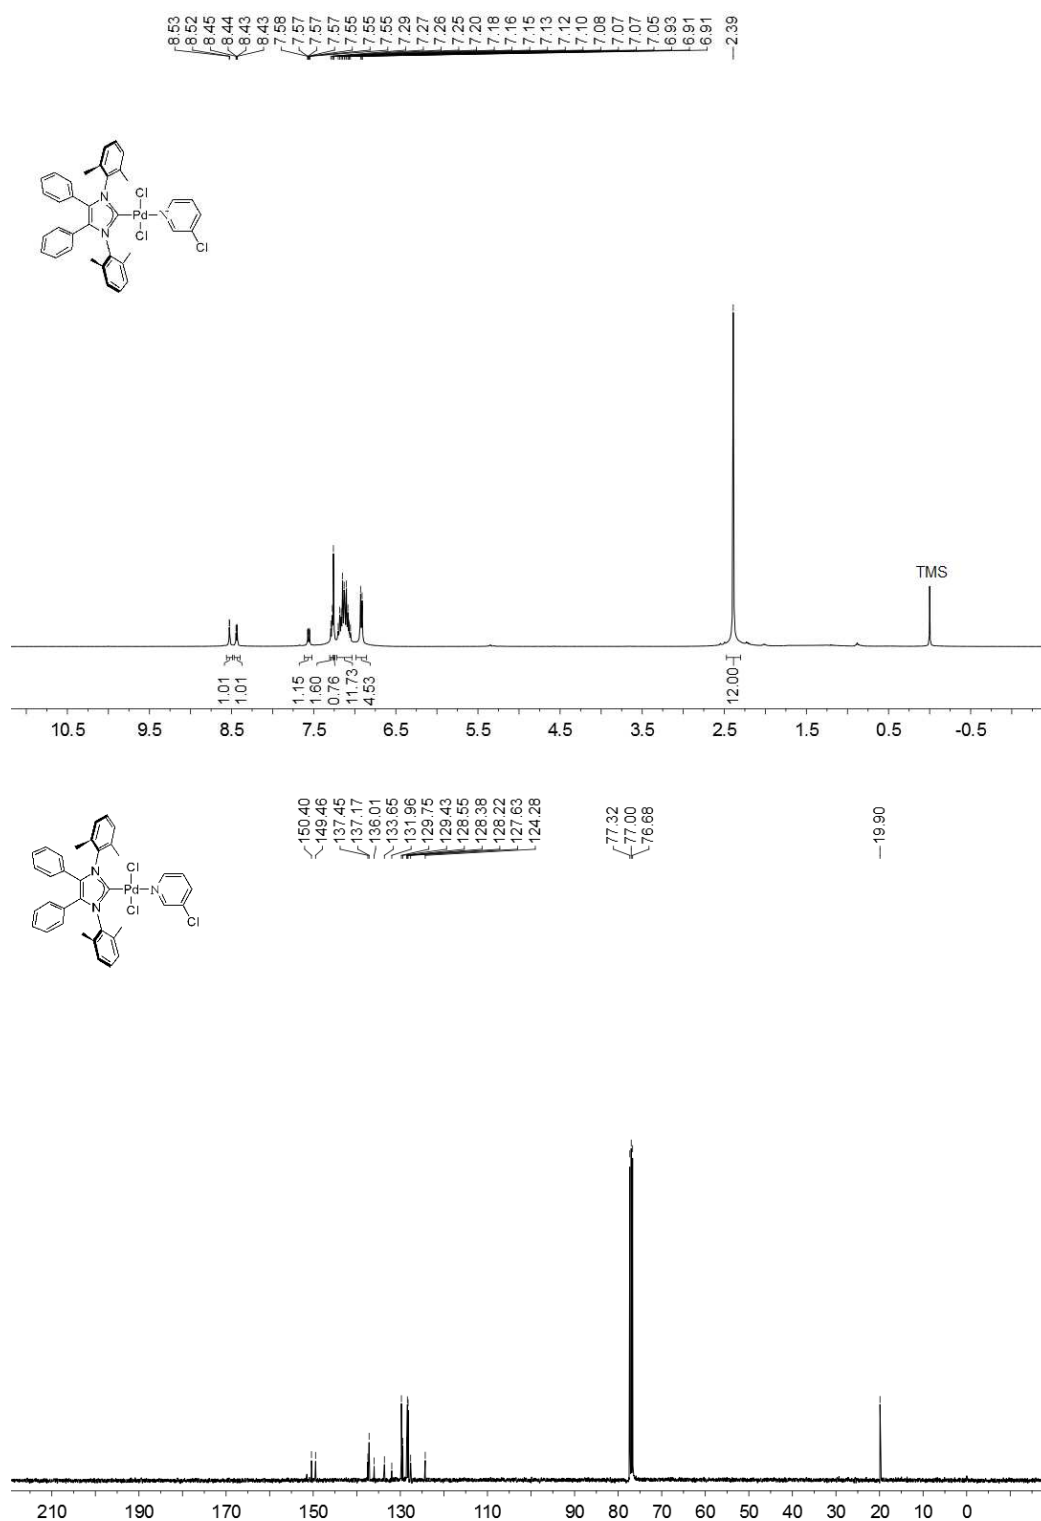

Figure S8. The NMR spectra of the Pd-PEPPSI complex of C3.

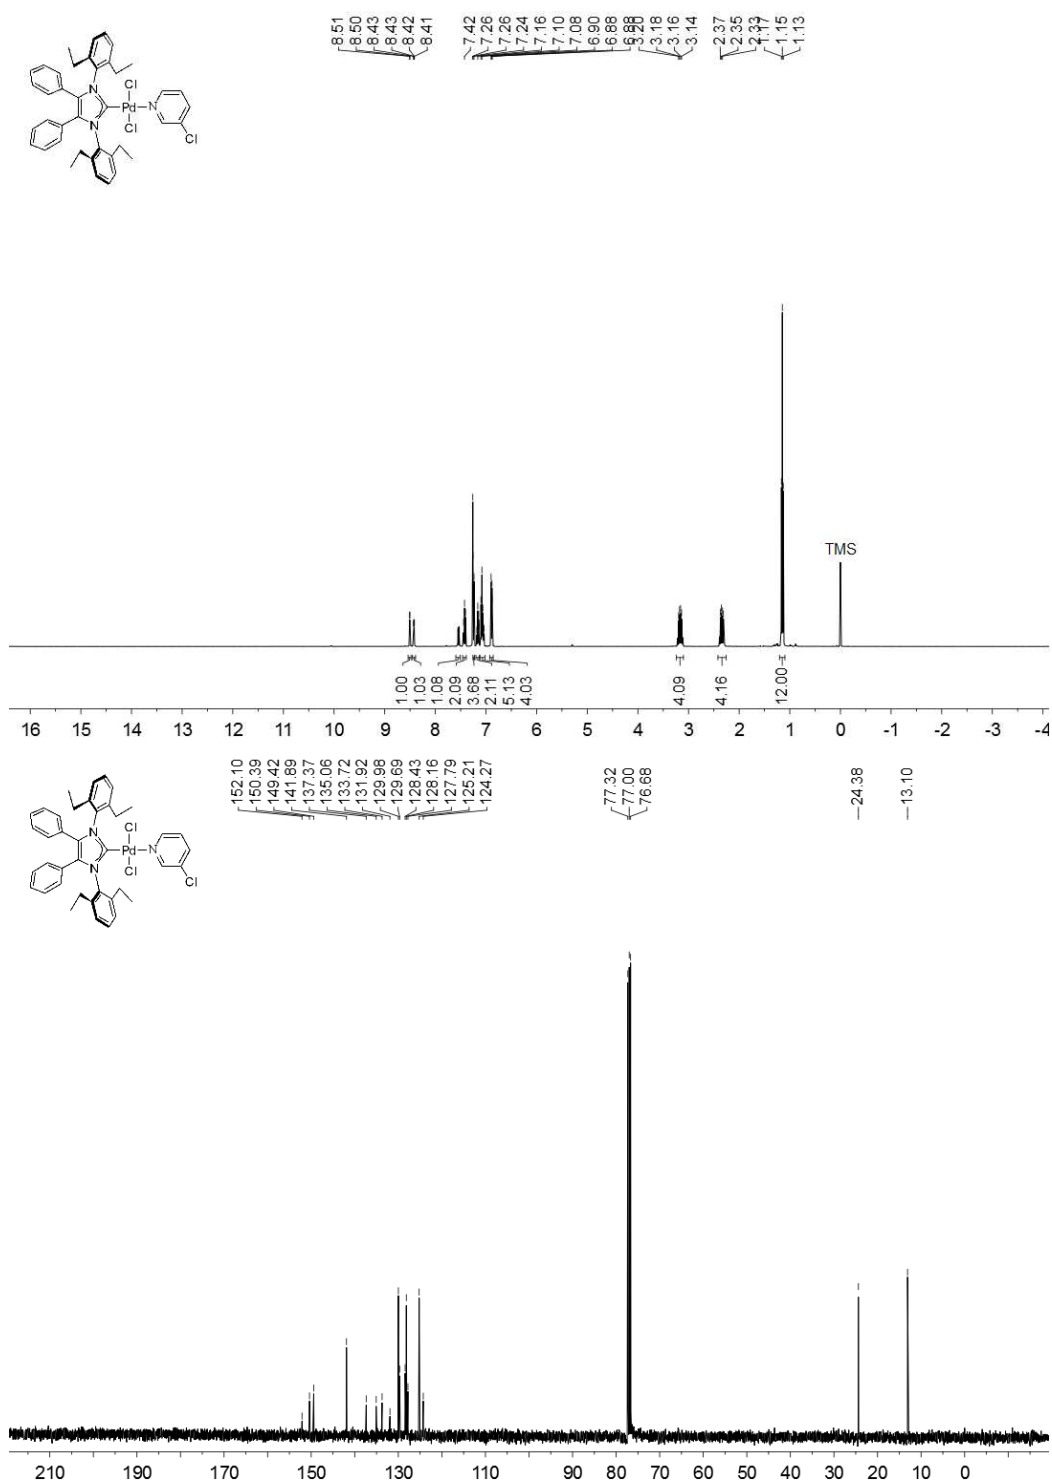

Figure S9. The NMR spectra of the Pd-PEPPSI complex of **C4**.

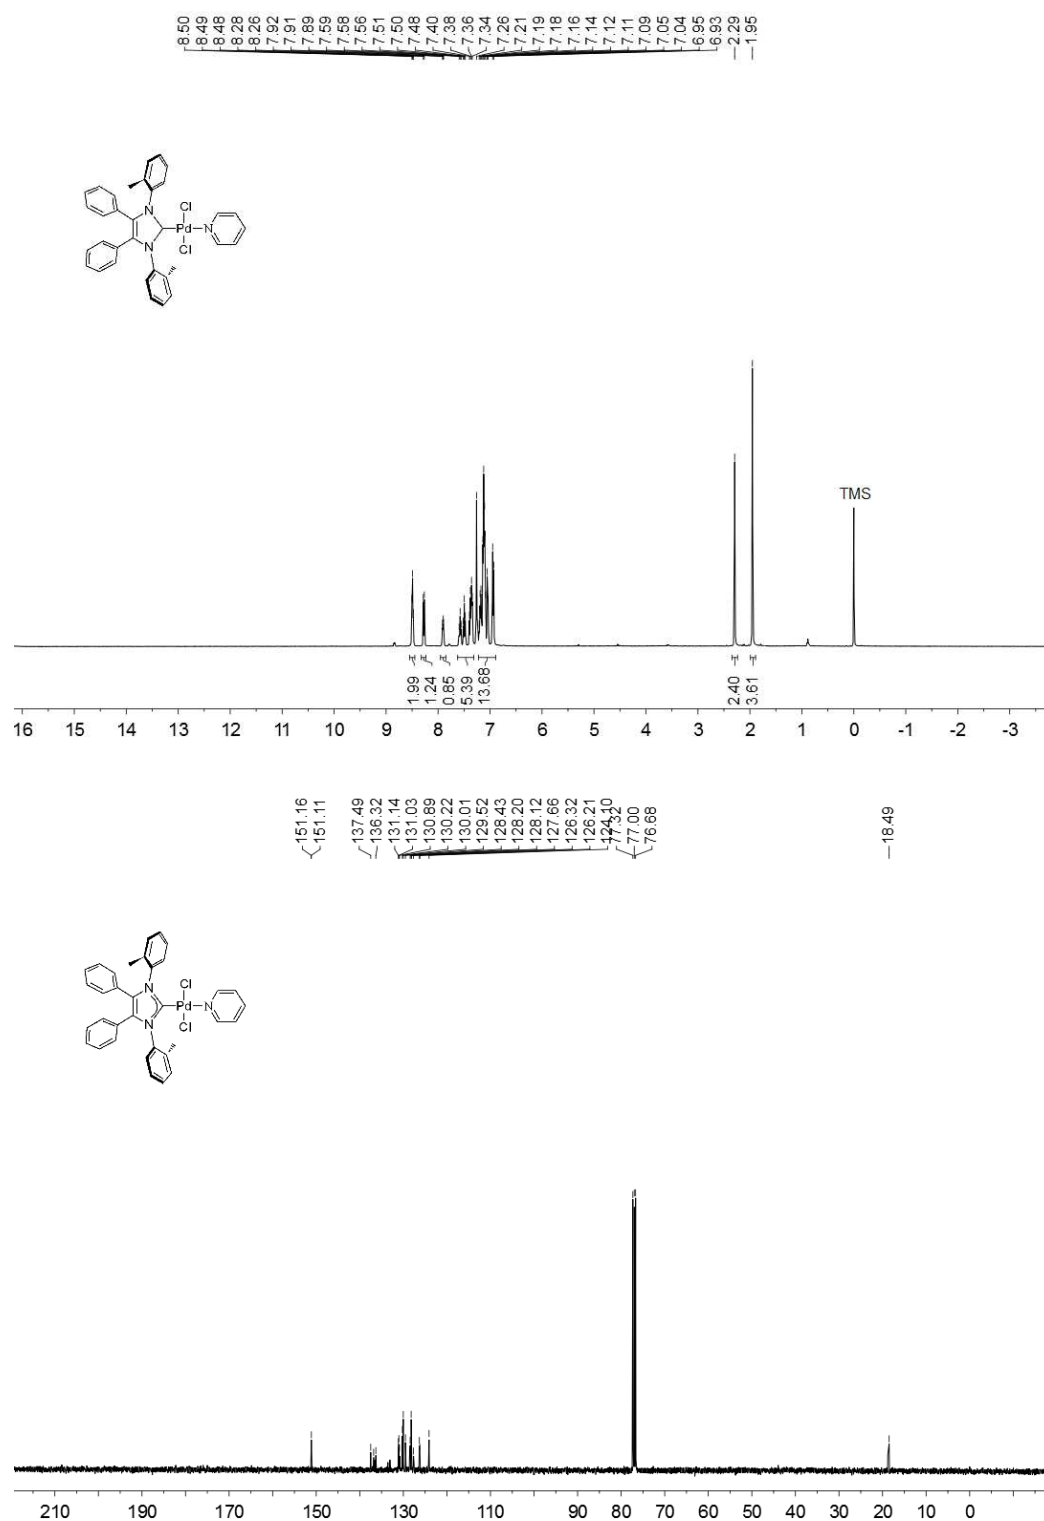

Figure S10. The NMR spectrums of the Pd-PEPPSI complex of **C5**.

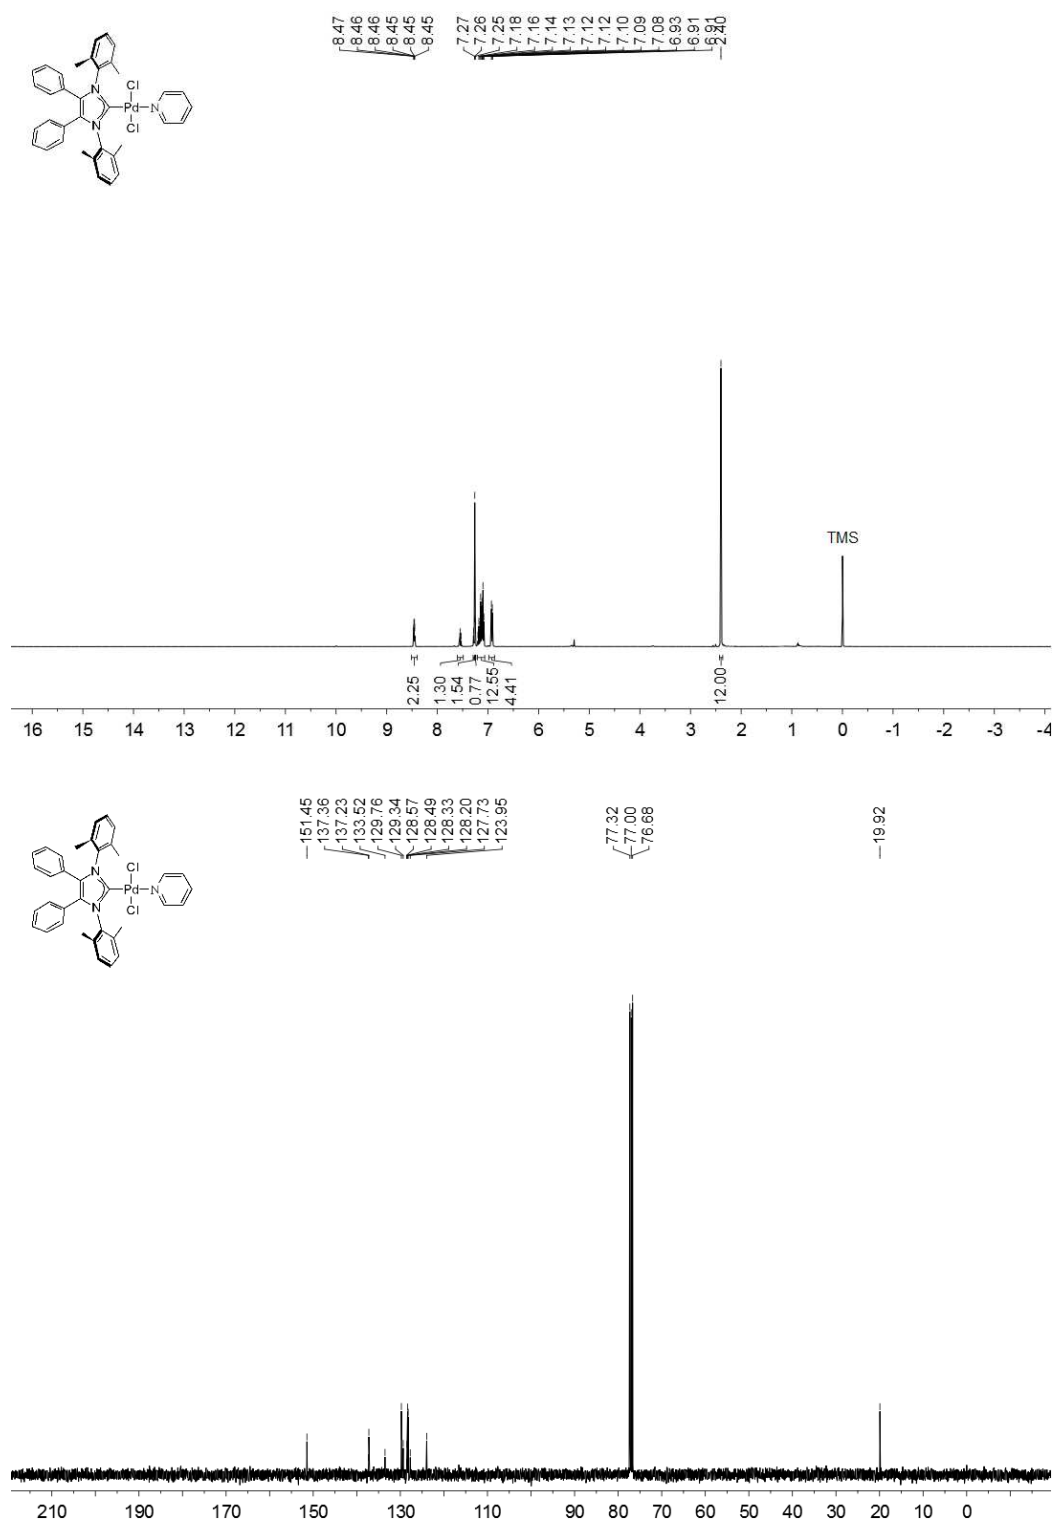



Figure S11. The NMR spectra of the Pd-PEPPSI complex of C6.

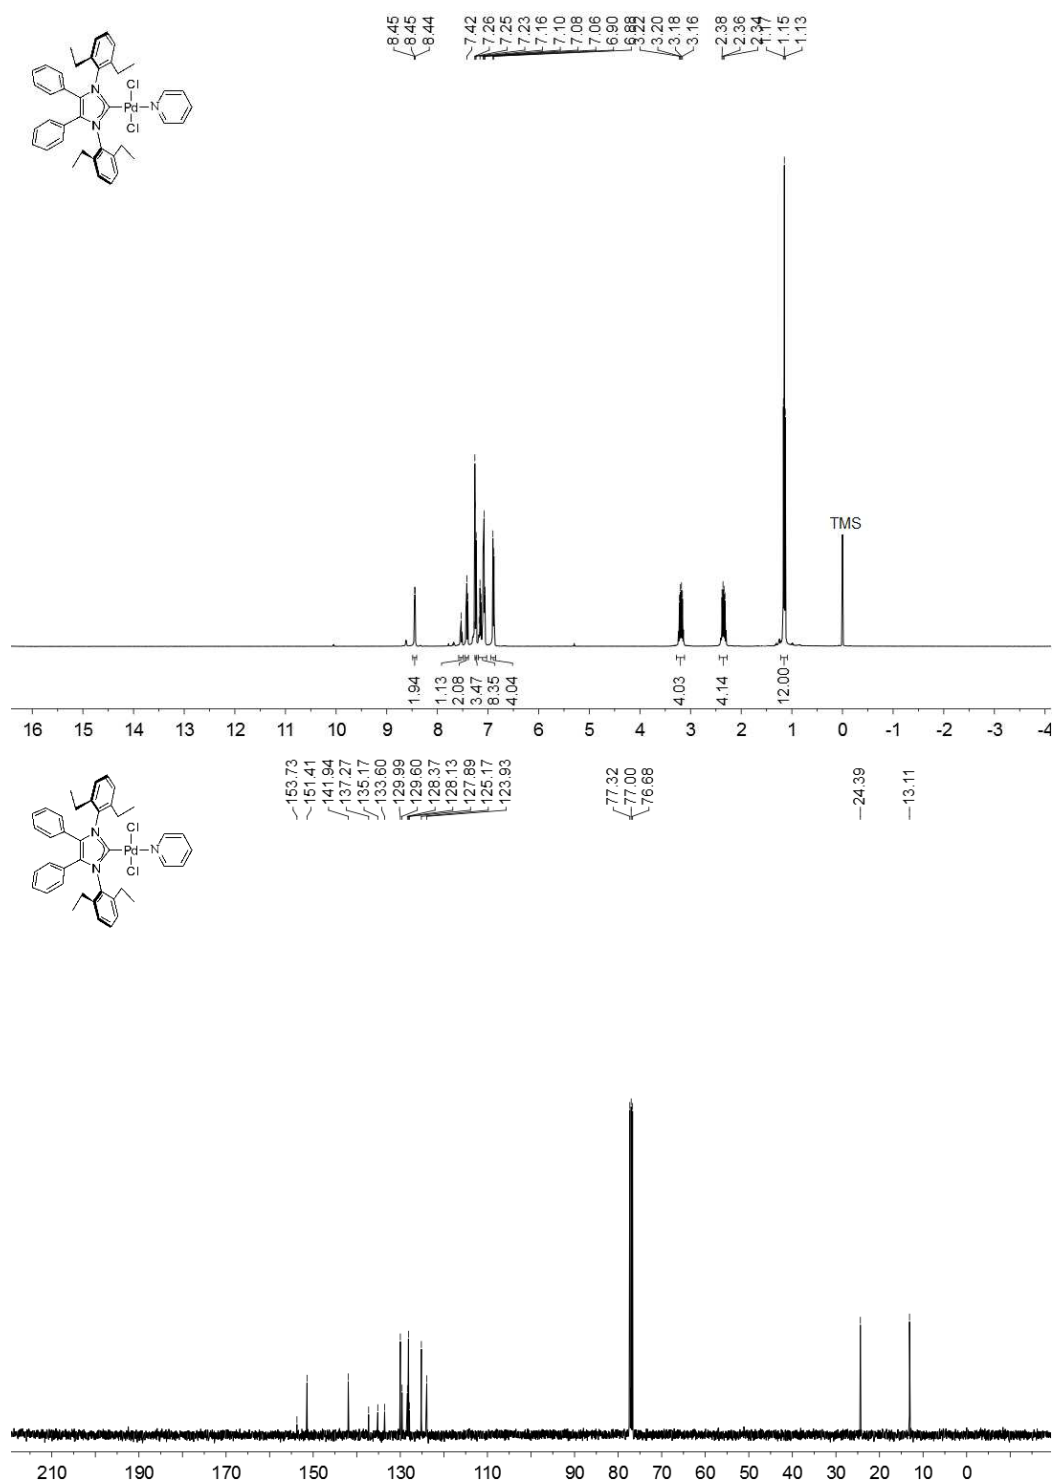

Figure S12. The NMR spectrums of 5-(4-chlorophenyl)-1-methyl-1H-imidazole (**9aa**)

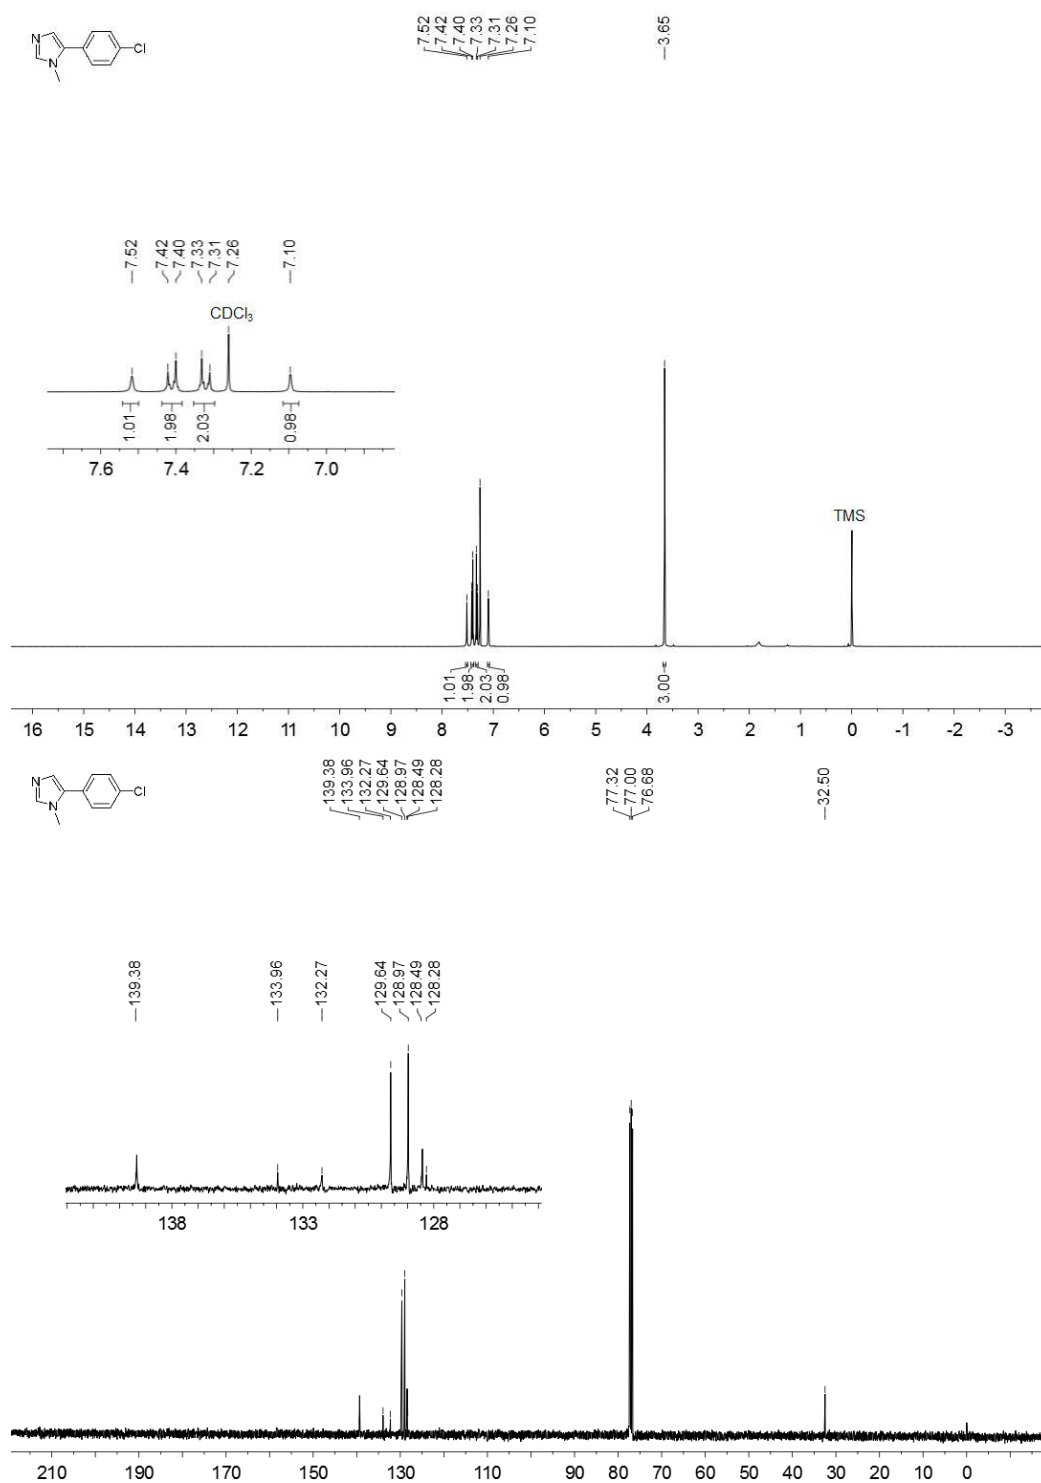

Figure S13. The NMR spectrums of methyl 4-(1-methyl-1H-imidazol-5-yl)benzoate (**9ab**)

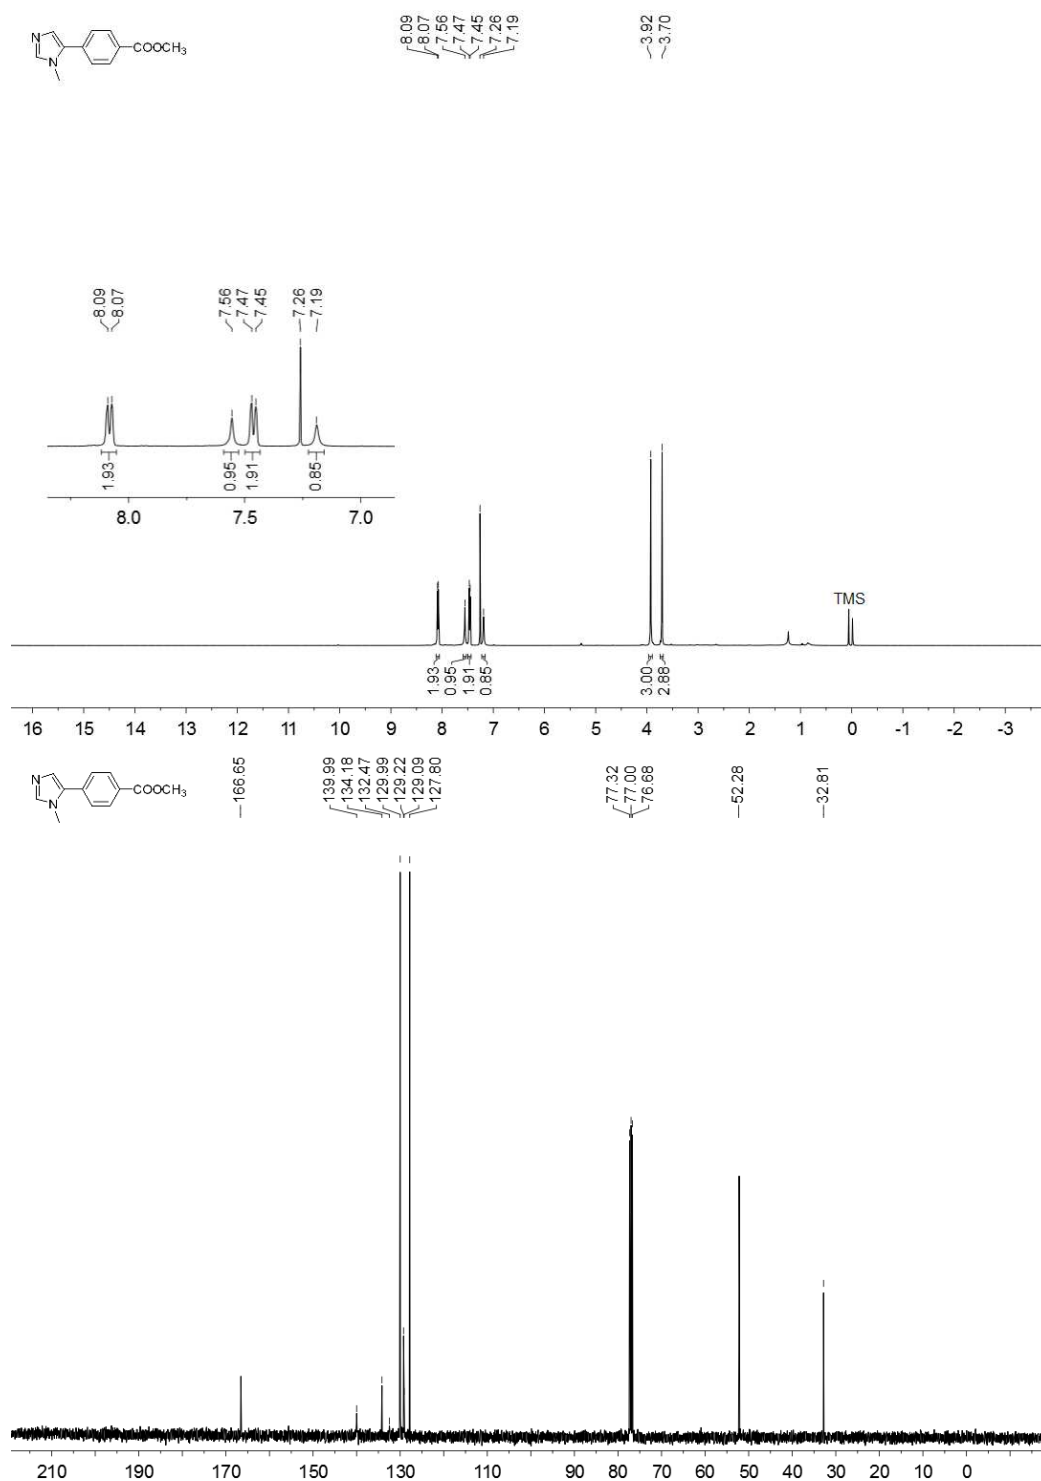

Figure S14. The NMR spectrums of 1-methyl-5-(4-nitrophenyl)-1H-imidazole (**9ac**)

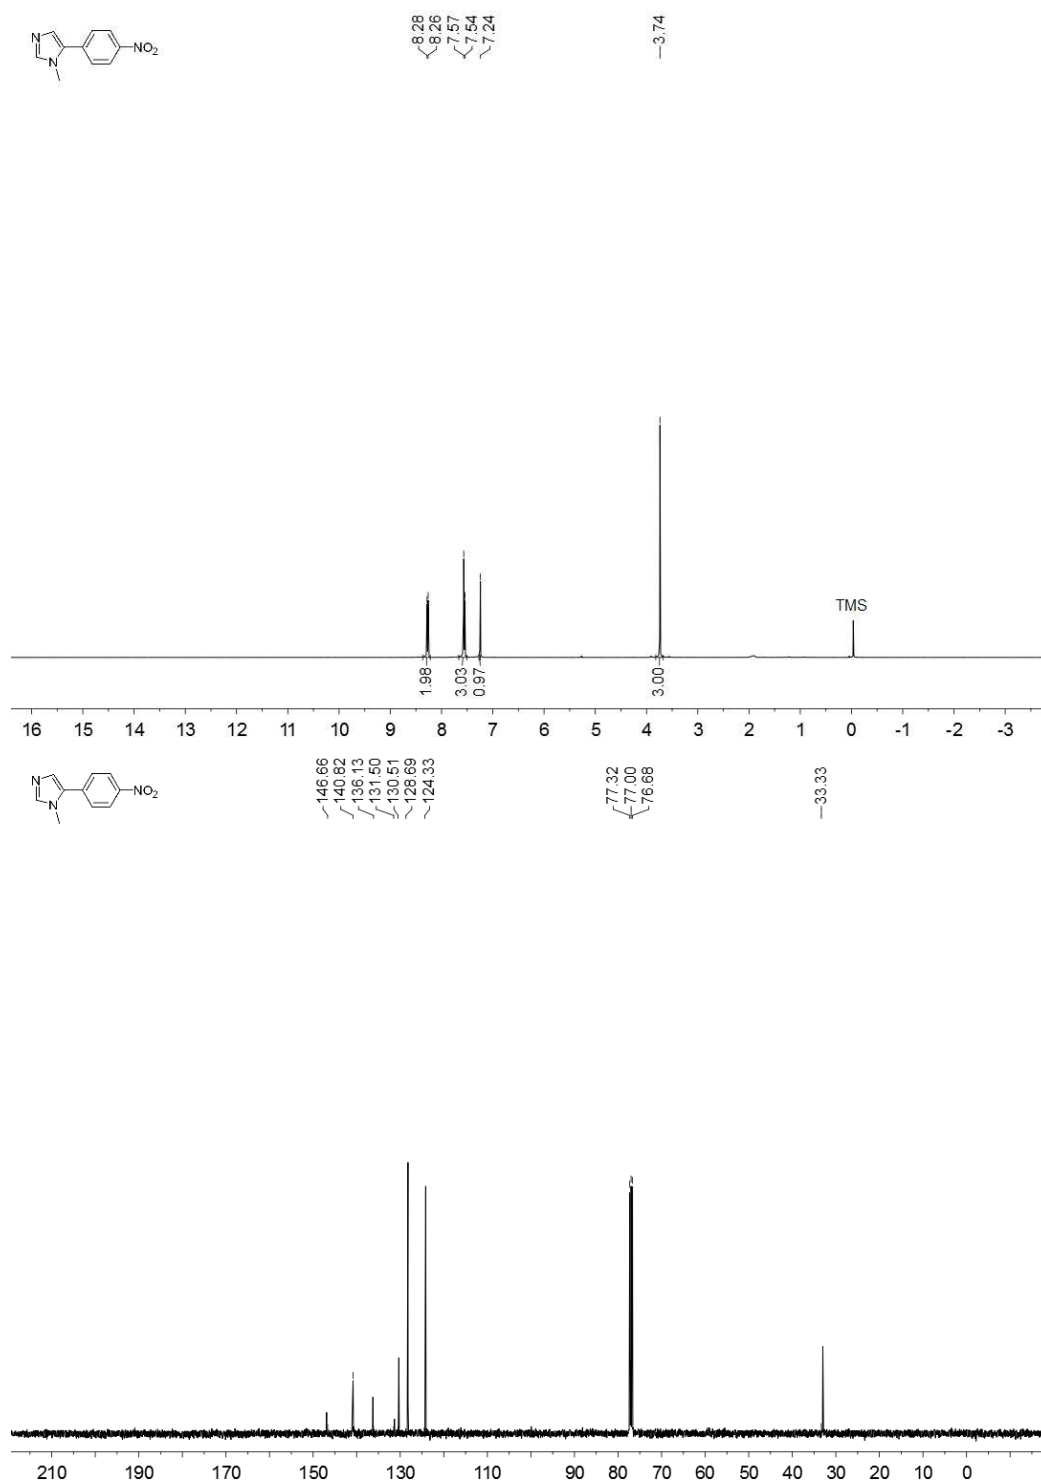

Figure S15. The NMR spectrums of 4-(1-methyl-1H-imidazol-5-yl)benzonitrile (**9ad**)

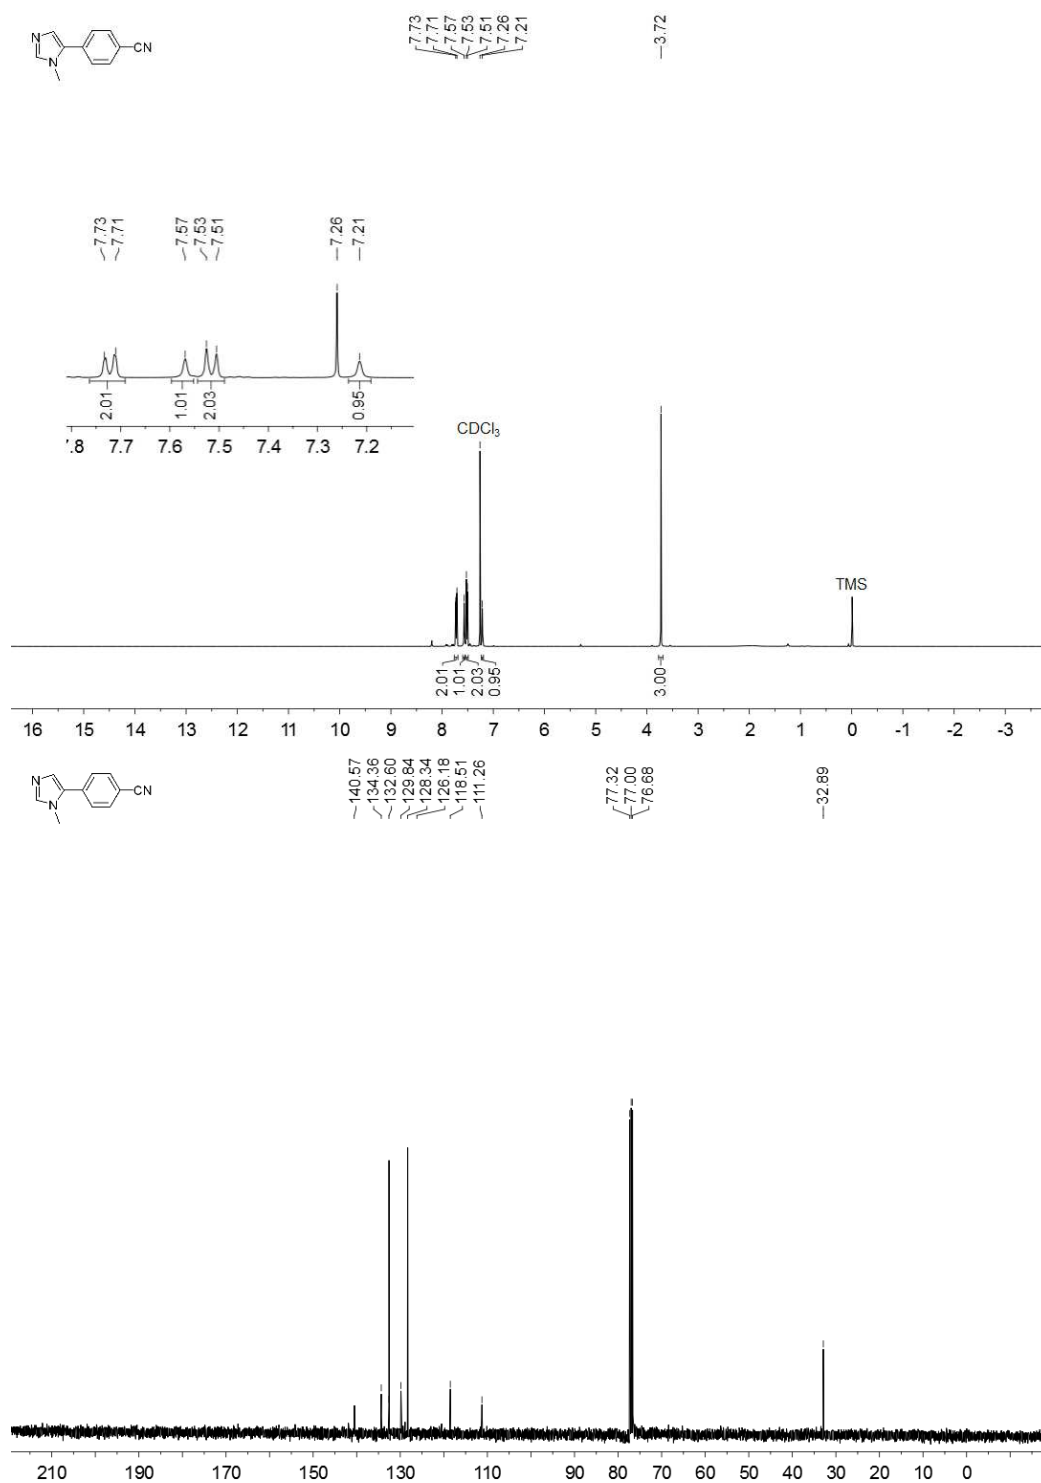

Figure S16. The NMR spectra of 4-(1-methyl-1H-imidazol-5-yl)benzaldehyde (**9ae**)

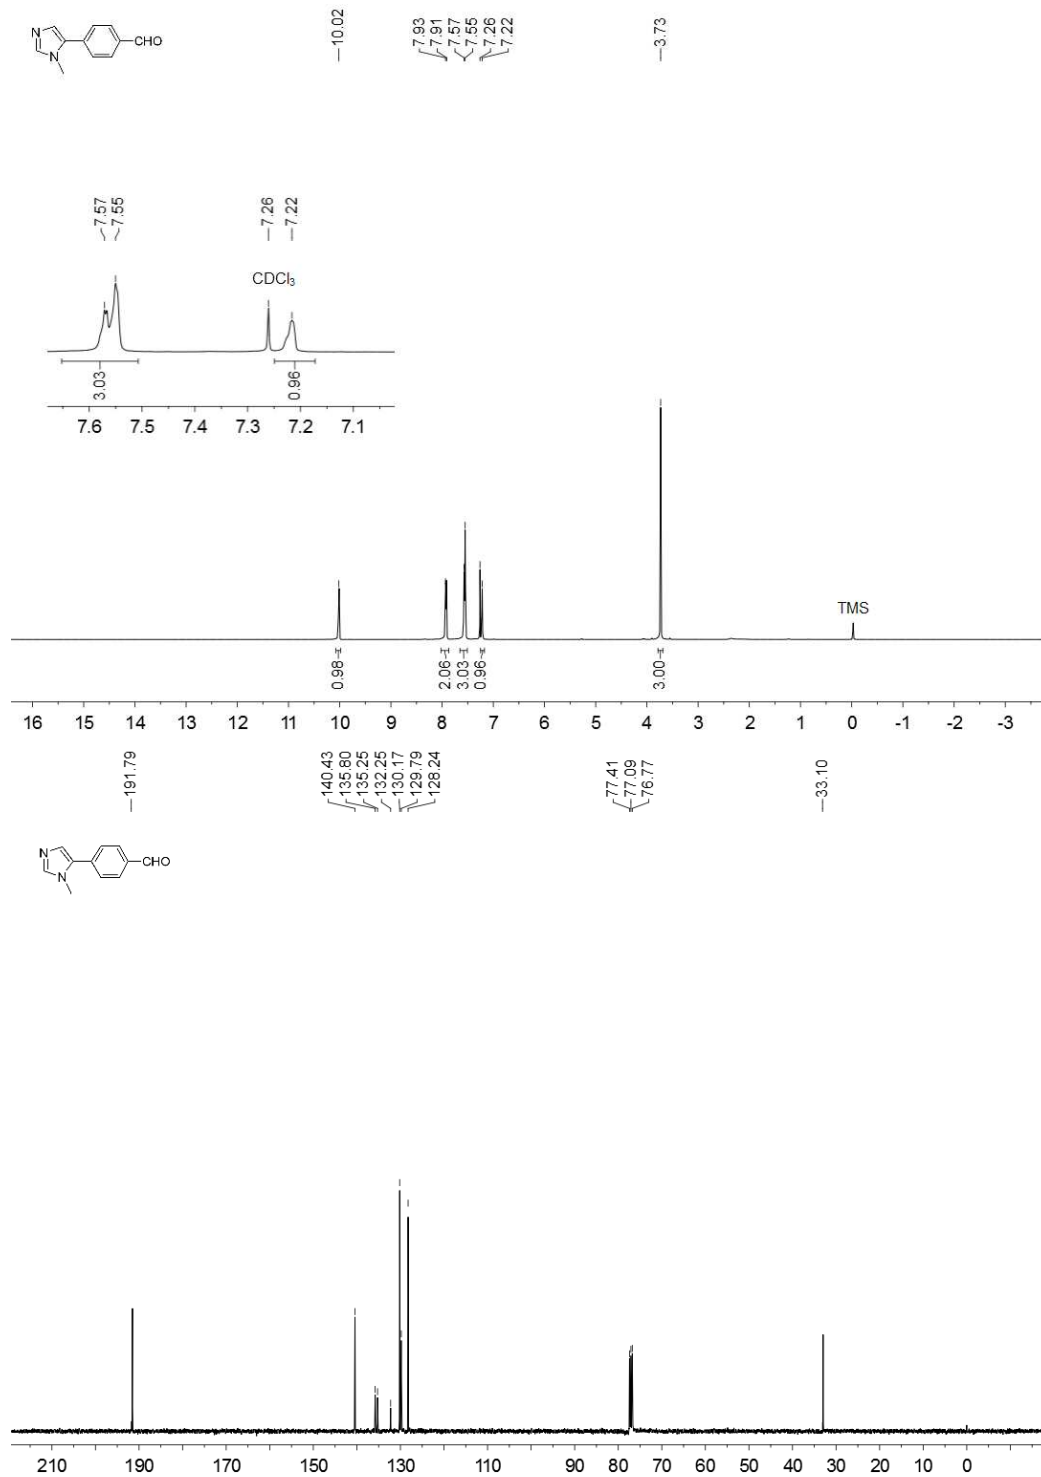

Figure S17. The NMR spectra of 1-(4-(1-methyl-1H-imidazol-5-yl)phenyl)ethanone (**9af**)

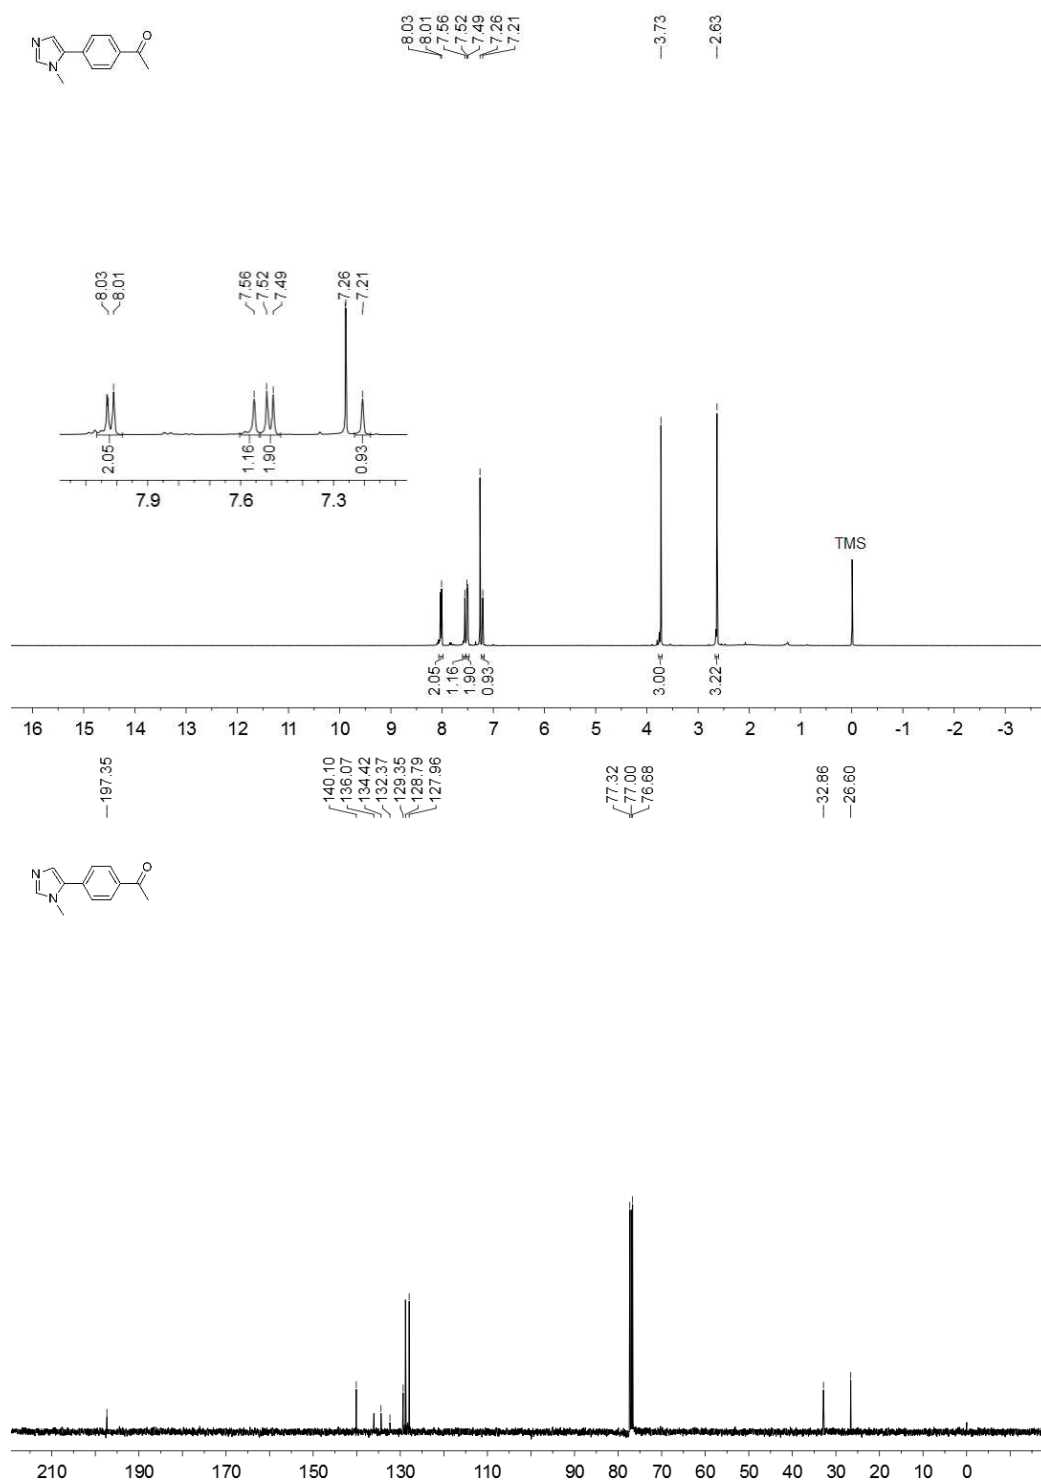

Figure S18. The NMR spectra of 1-methyl-5-(4-(trifluoromethyl)phenyl)-1H-imidazole (**9ag**)

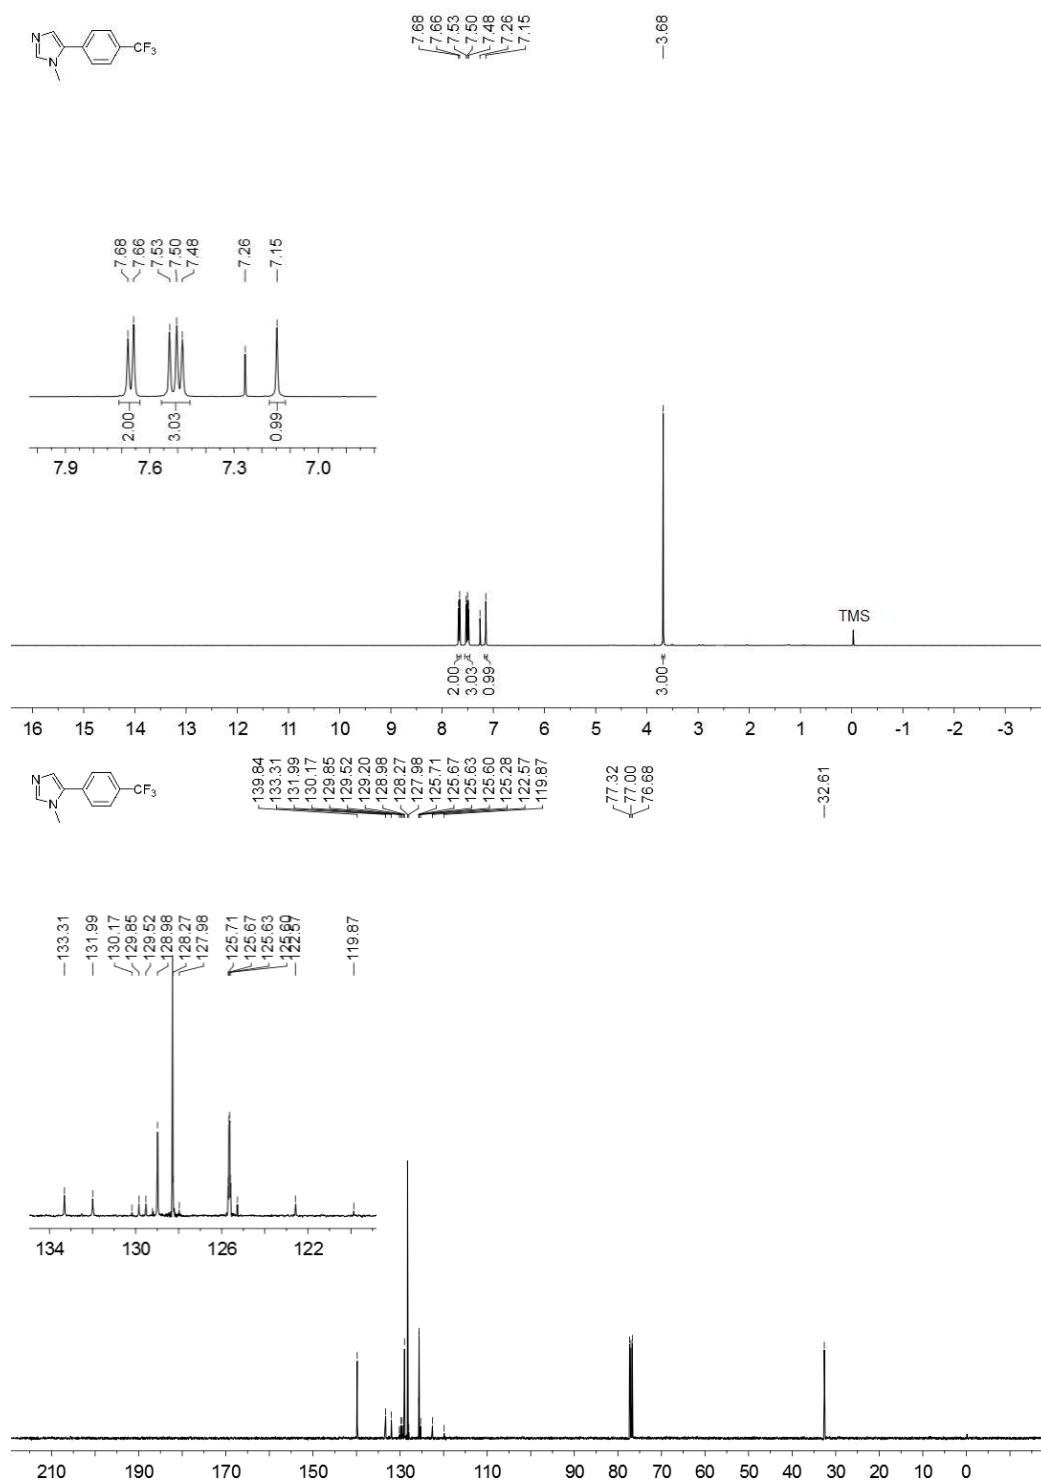



Figure S19. The NMR spectrums of 5-(4-fluorophenyl)-1-methyl-1H-imidazole (**9ah**)

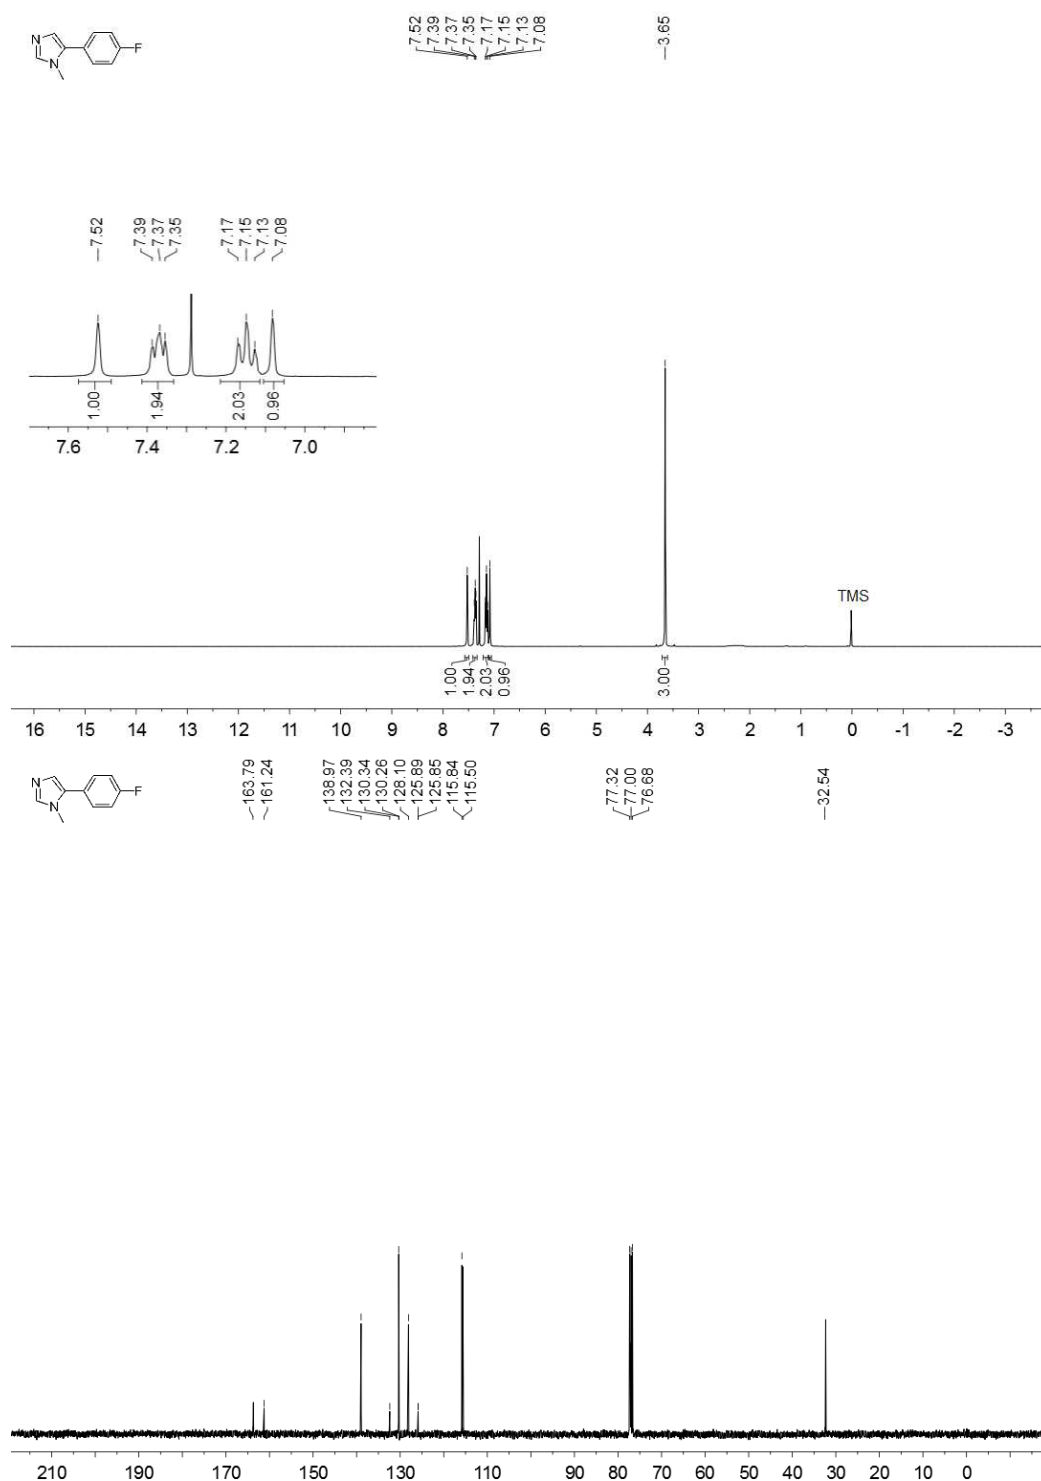

Figure S20. The NMR spectrums of 1-methyl-5-phenyl-1H-imidazole (**9ai**)

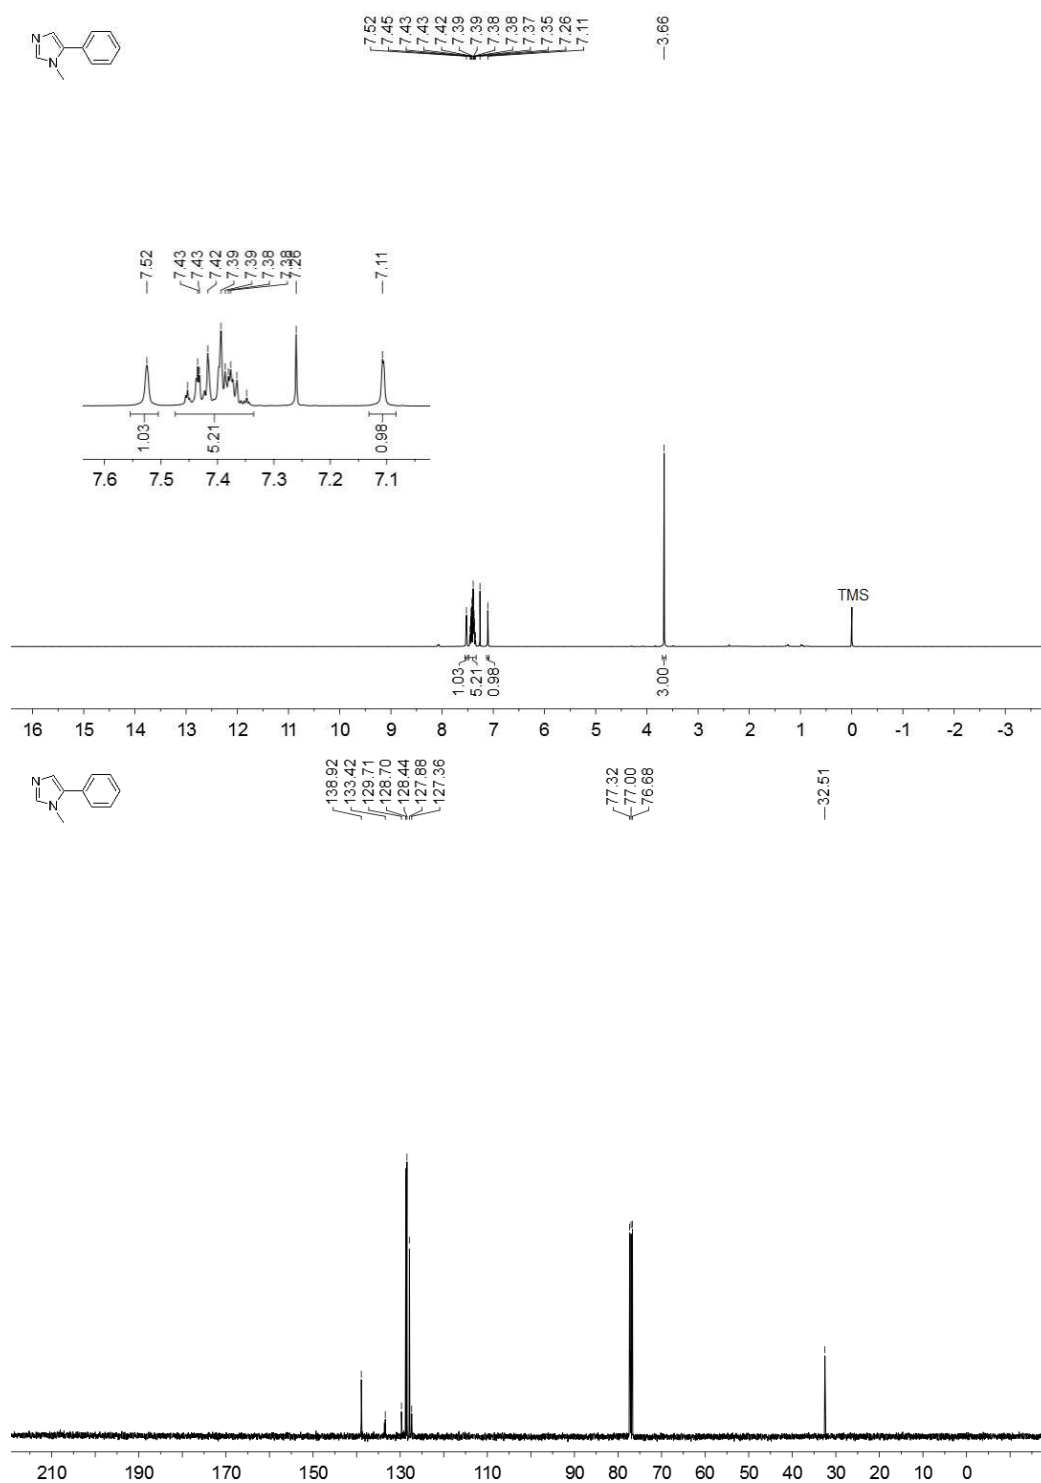

**<sup>1</sup>H NMR Spectrum (Top):**

Chemical structure: c1ccc2c(c1)sc(c2)c3ccc4ccccc43

Chemical shift (ppm): 7.94, 7.93, 7.91, 7.66, 7.64, 7.56, 7.54, 7.53, 7.53, 7.52, 7.51, 7.50, 7.48, 7.46, 7.44, 7.26, 7.16.

Integration values: 2.05, 2.00, 4.12, 0.99.

**<sup>13</sup>C NMR Spectrum (Bottom):**

Chemical structure: c1ccc2c(c1)sc(c2)c3ccc4ccccc43

Chemical shift (ppm): 138.47, 133.65, 132.89, 131.13, 129.44, 129.21, 129.01, 128.38, 127.20, 126.74, 126.17, 125.49, 125.20, 77.32, 77.00, 76.68, 31.97.

Figure S22. The NMR spectra of 5-(3-methoxyphenyl)-1-methyl-1H-imidazole (**9ak**)

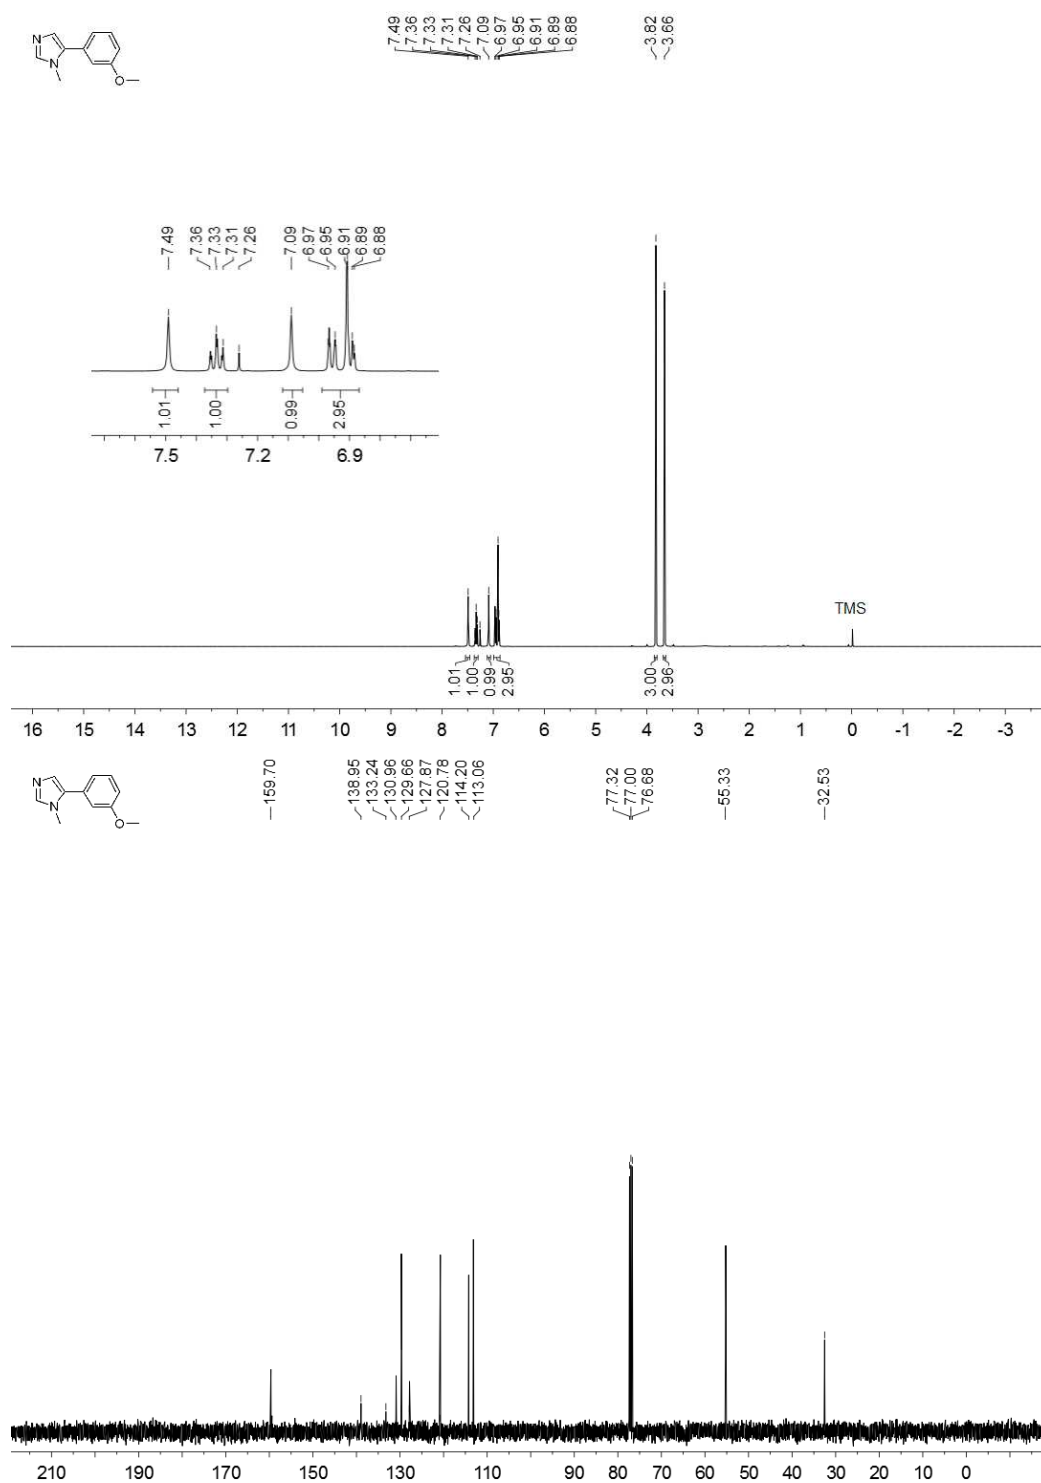

Figure S23. The NMR spectrums of 4-(1-methyl-1H-imidazol-5-yl)isoquinoline (**9al**)

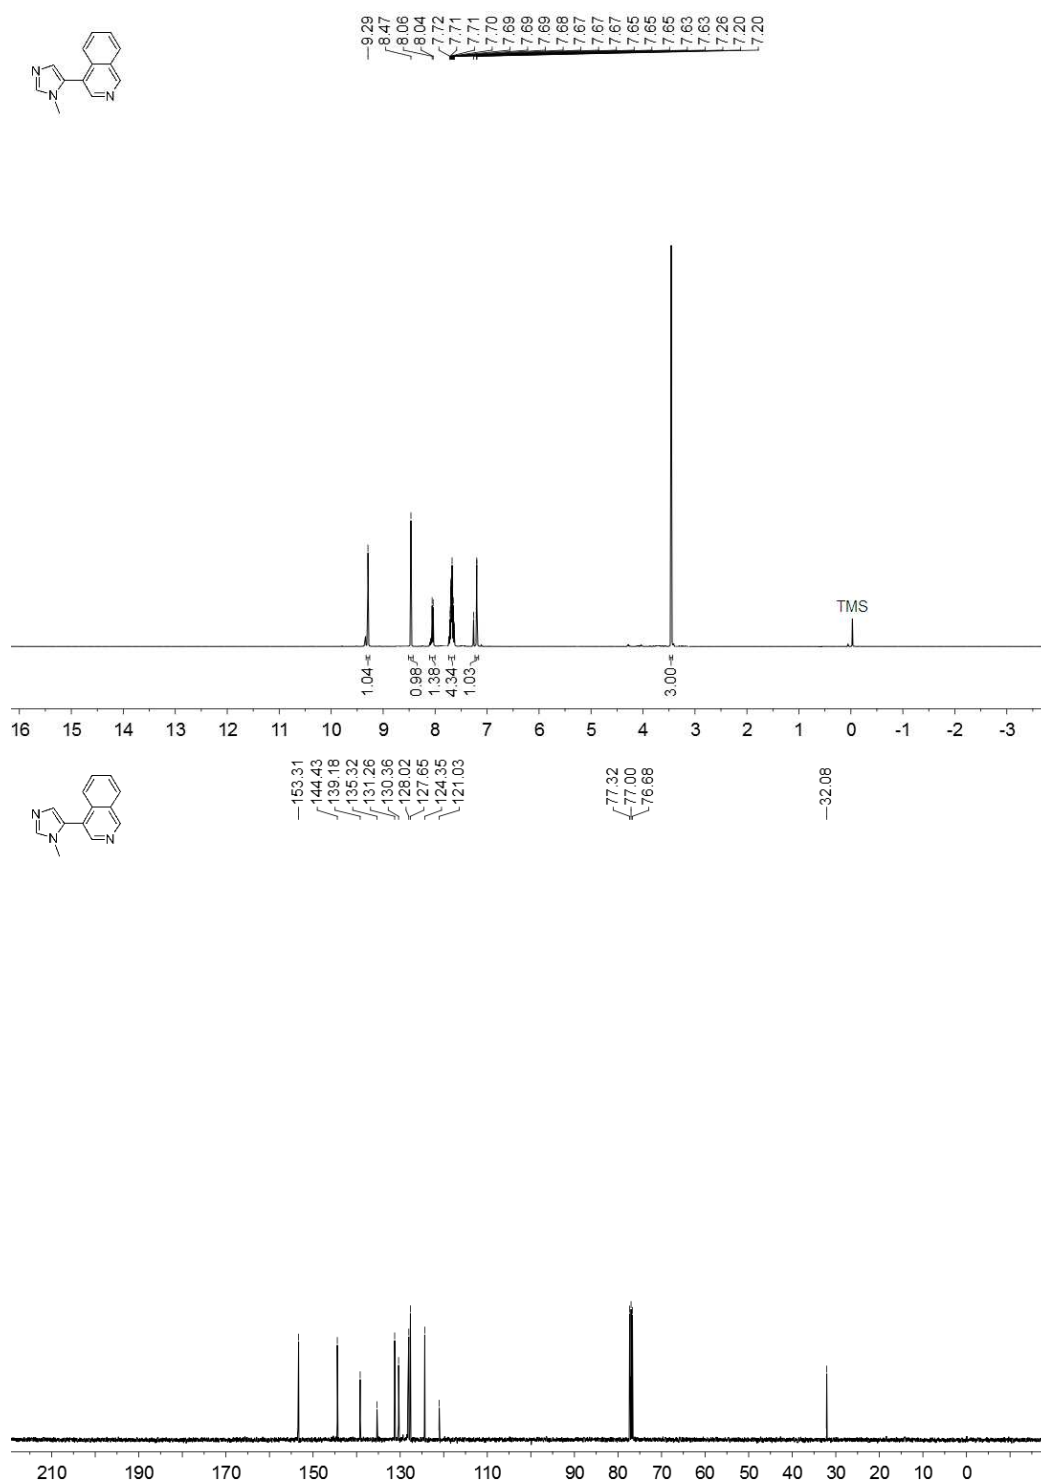

Figure S24. The NMR spectrums of 5-(4-chlorophenyl)-1,2-dimethyl-1H-imidazole (**9ba**)

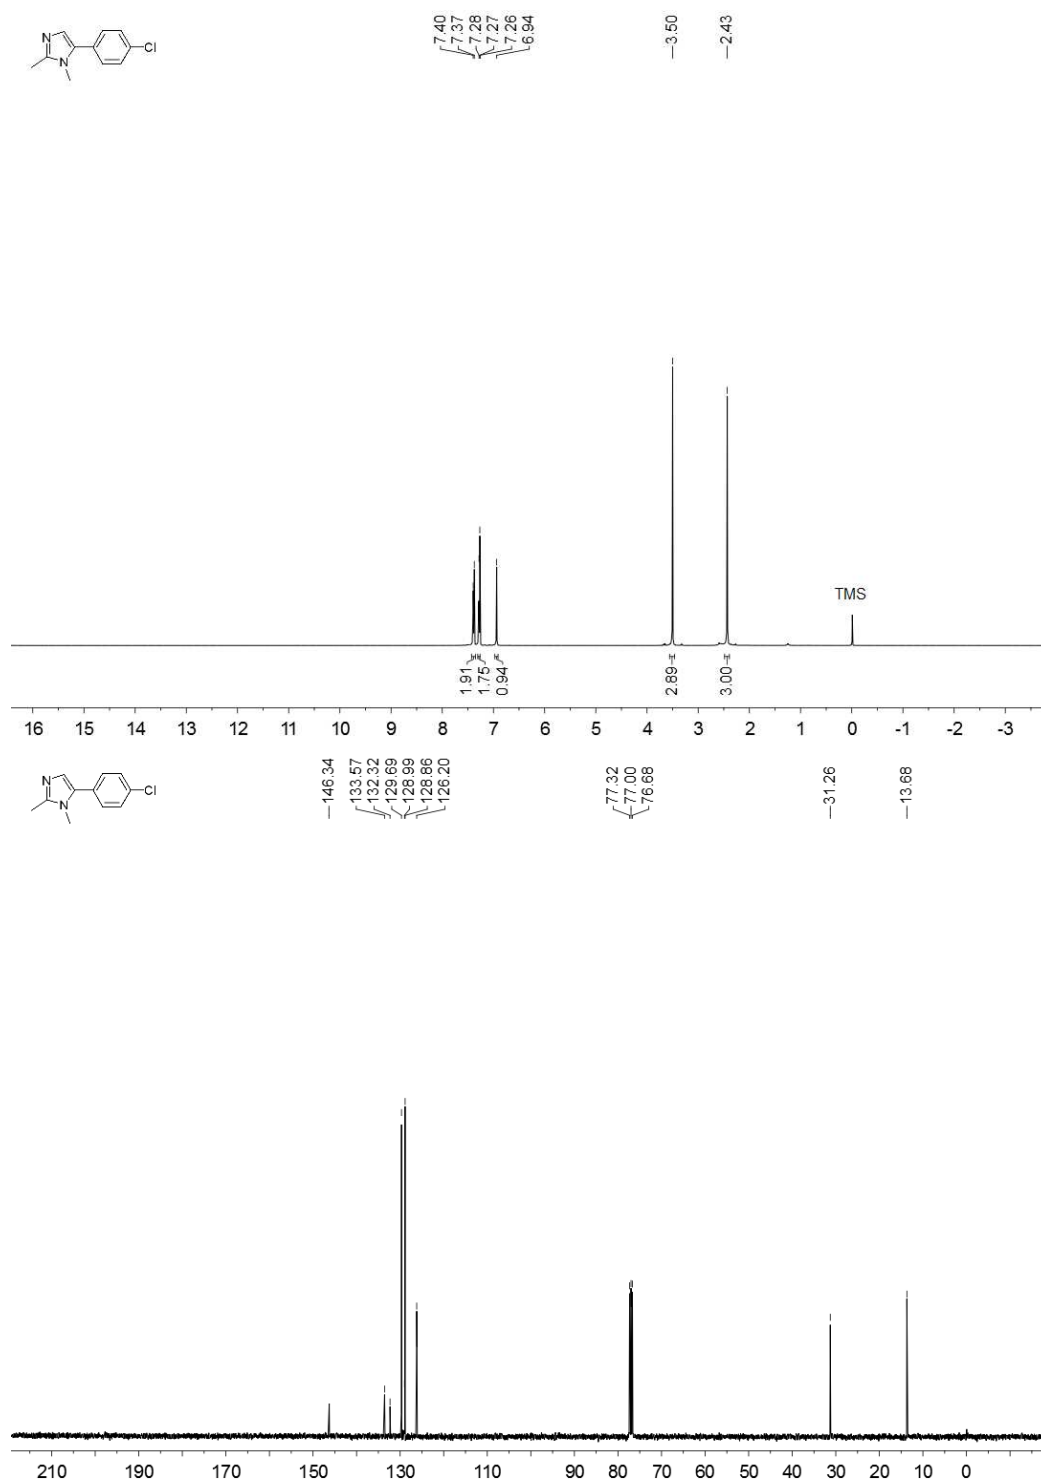

Figure S25. The NMR spectra of methyl 4-(1,2-dimethyl-1H-imidazol-5-yl)benzoate (**9bb**)

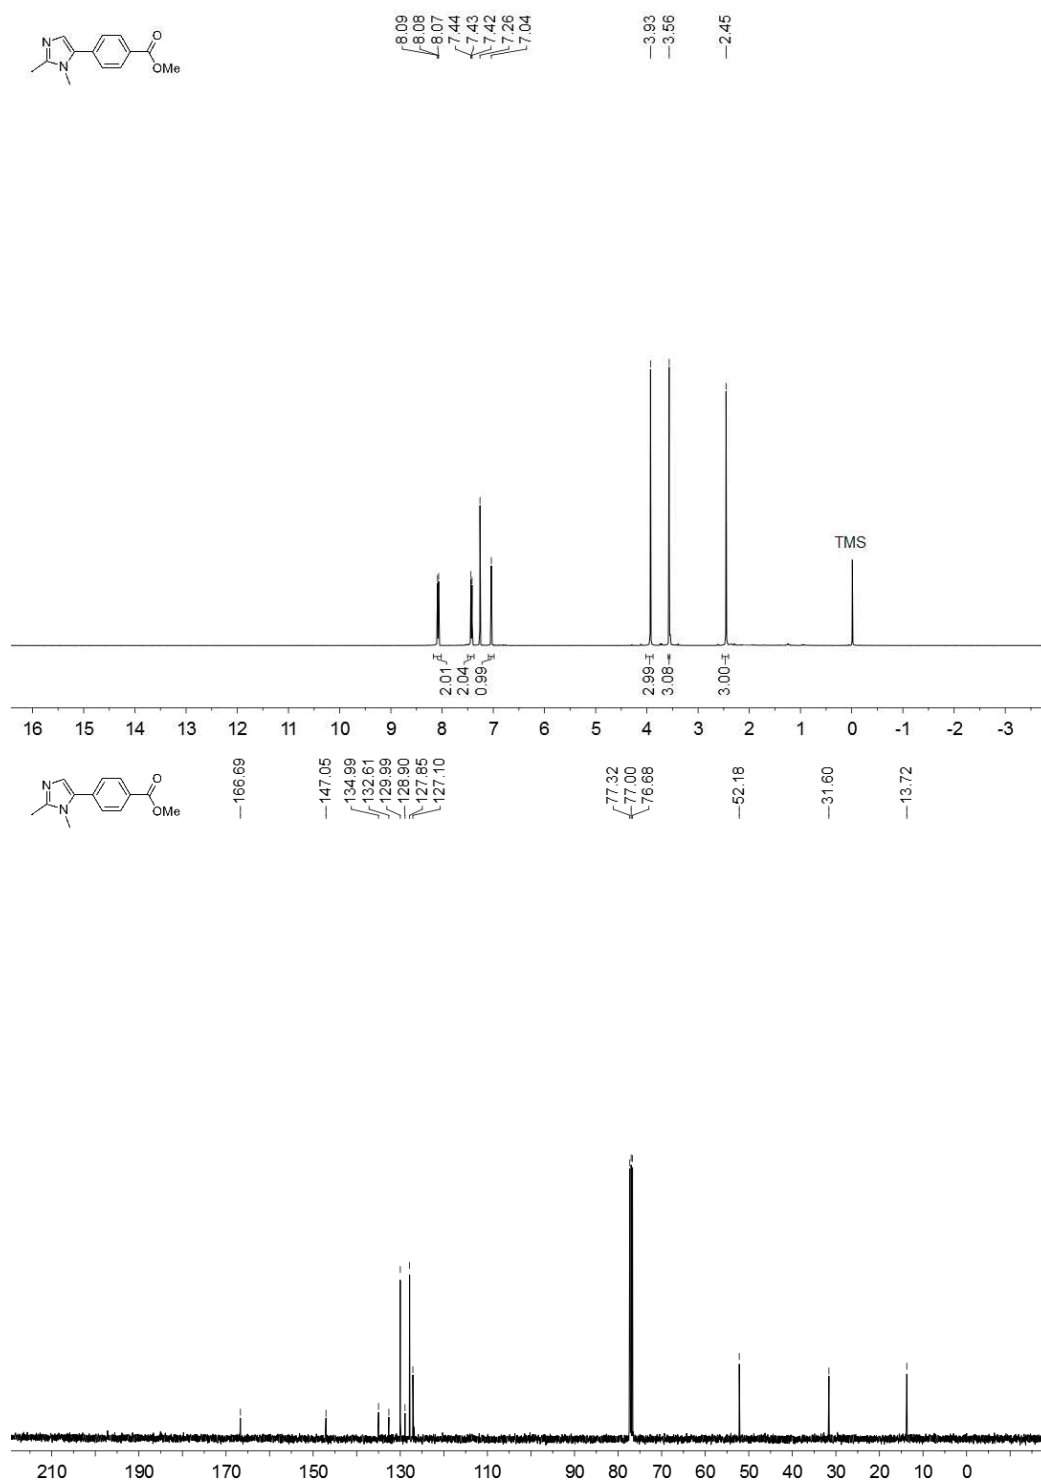

Figure S26. The NMR spectra of methyl 1,2-dimethyl-5-(4-nitrophenyl)-1H-imidazole (**9bc**)

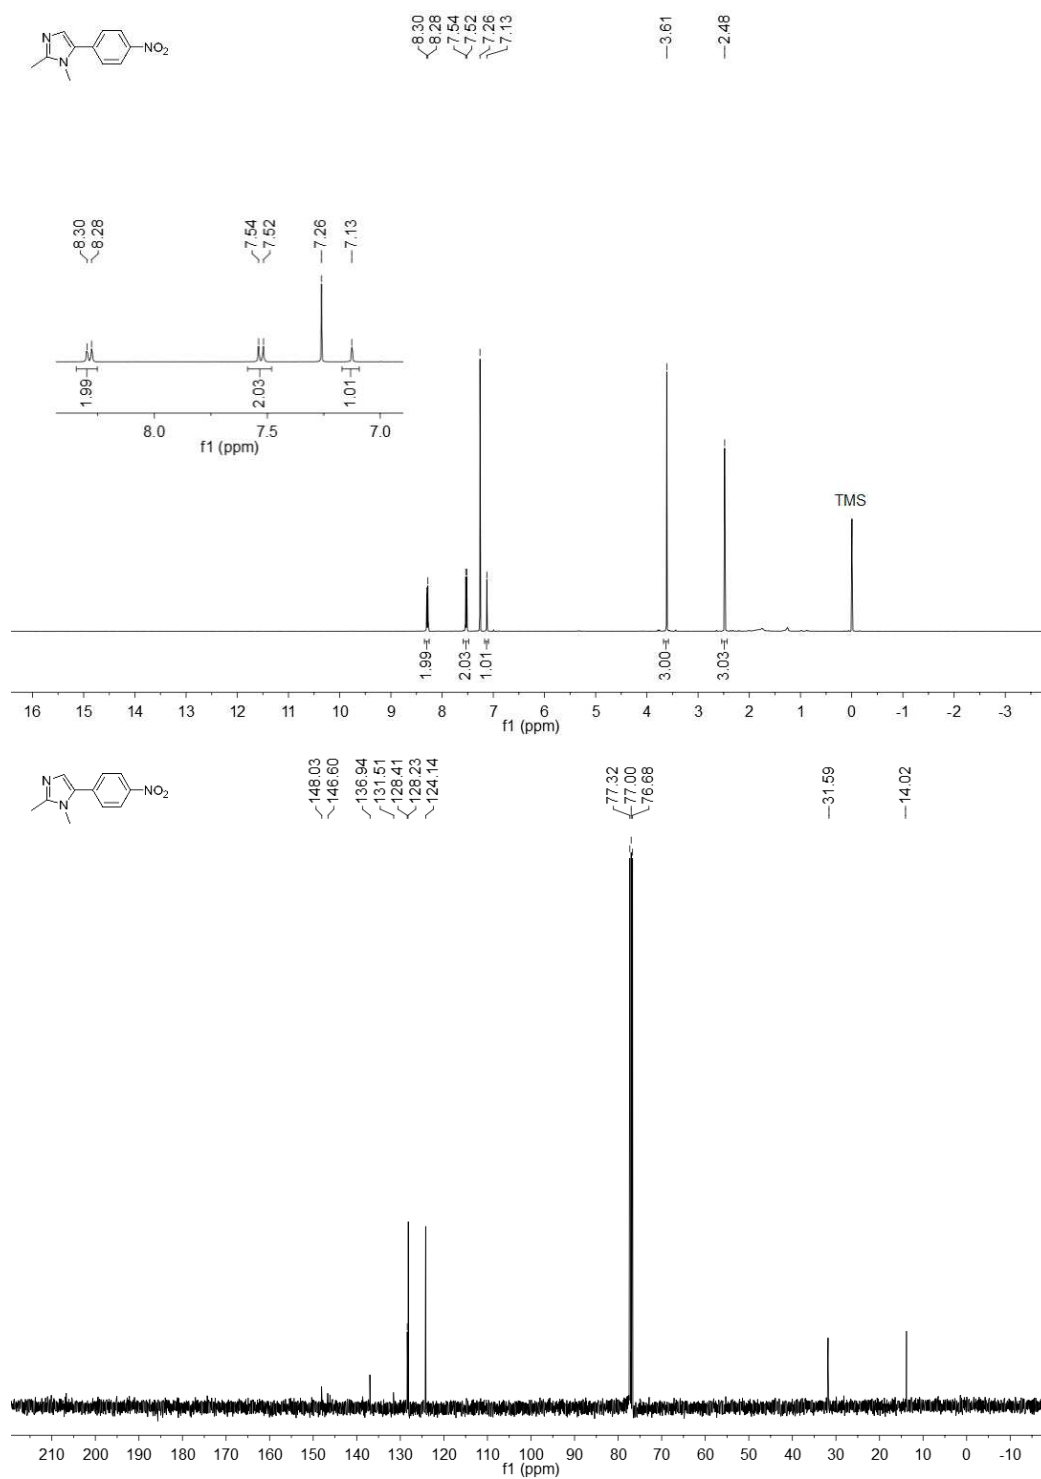



Figure S27. The NMR spectra of methyl 4-(1,2-dimethyl-1H-imidazol-5-yl)benzonitrile (**9bd**)

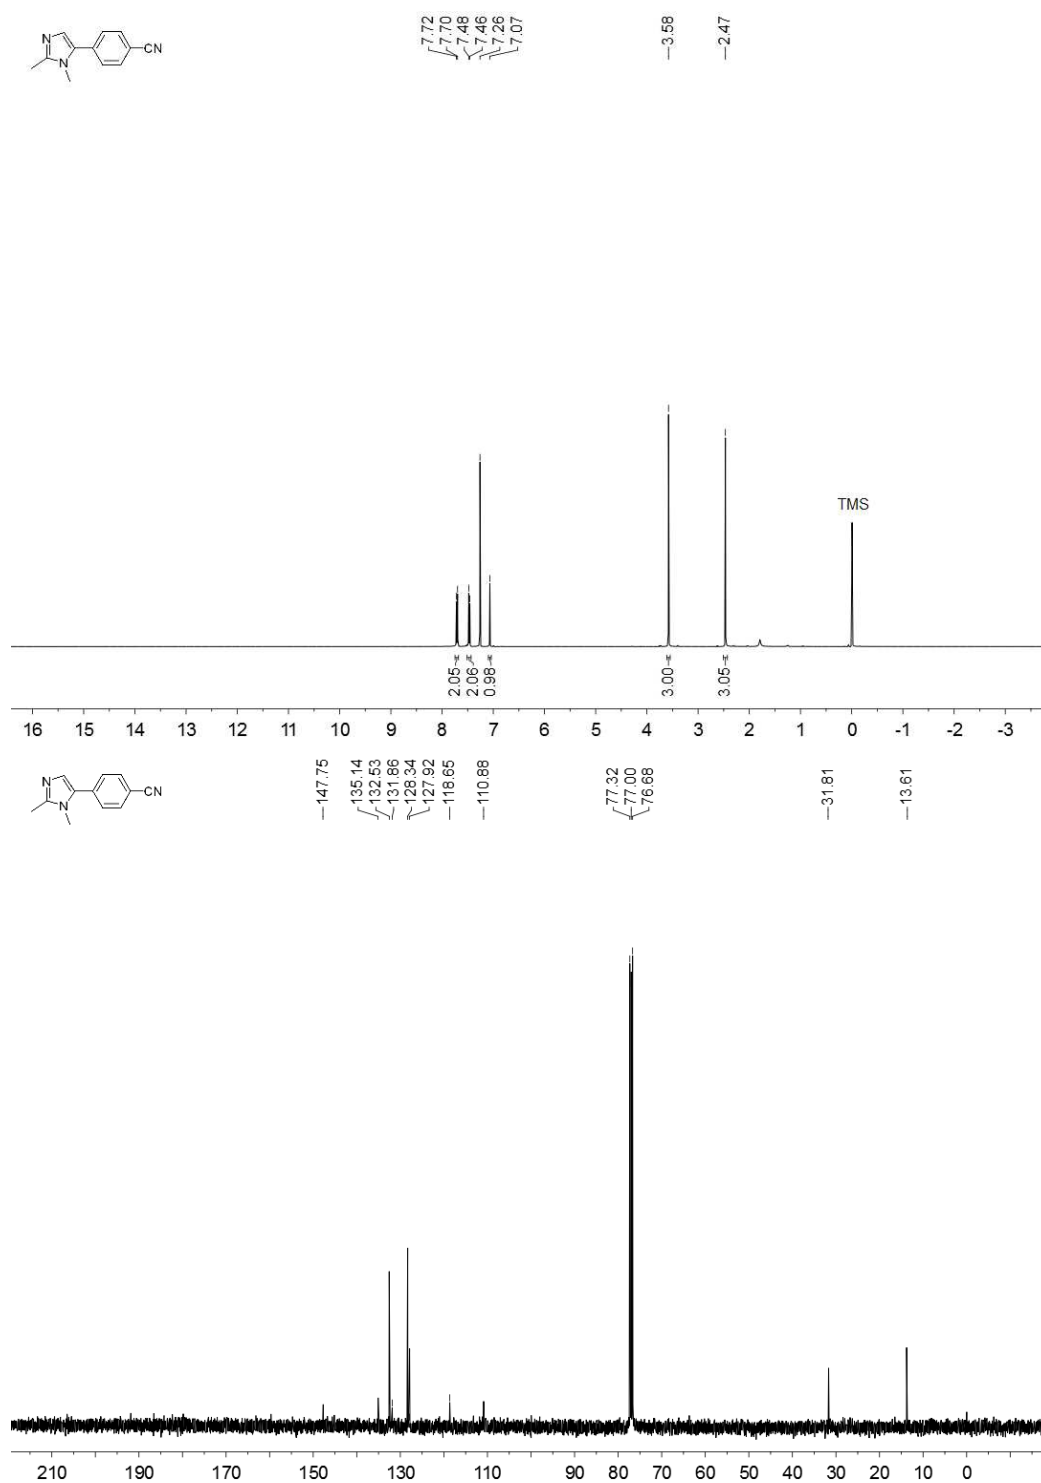

Figure S28. The NMR spectrums of 4-(1,2-dimethyl-1H-imidazol-5-yl)benzaldehyde (**9be**)

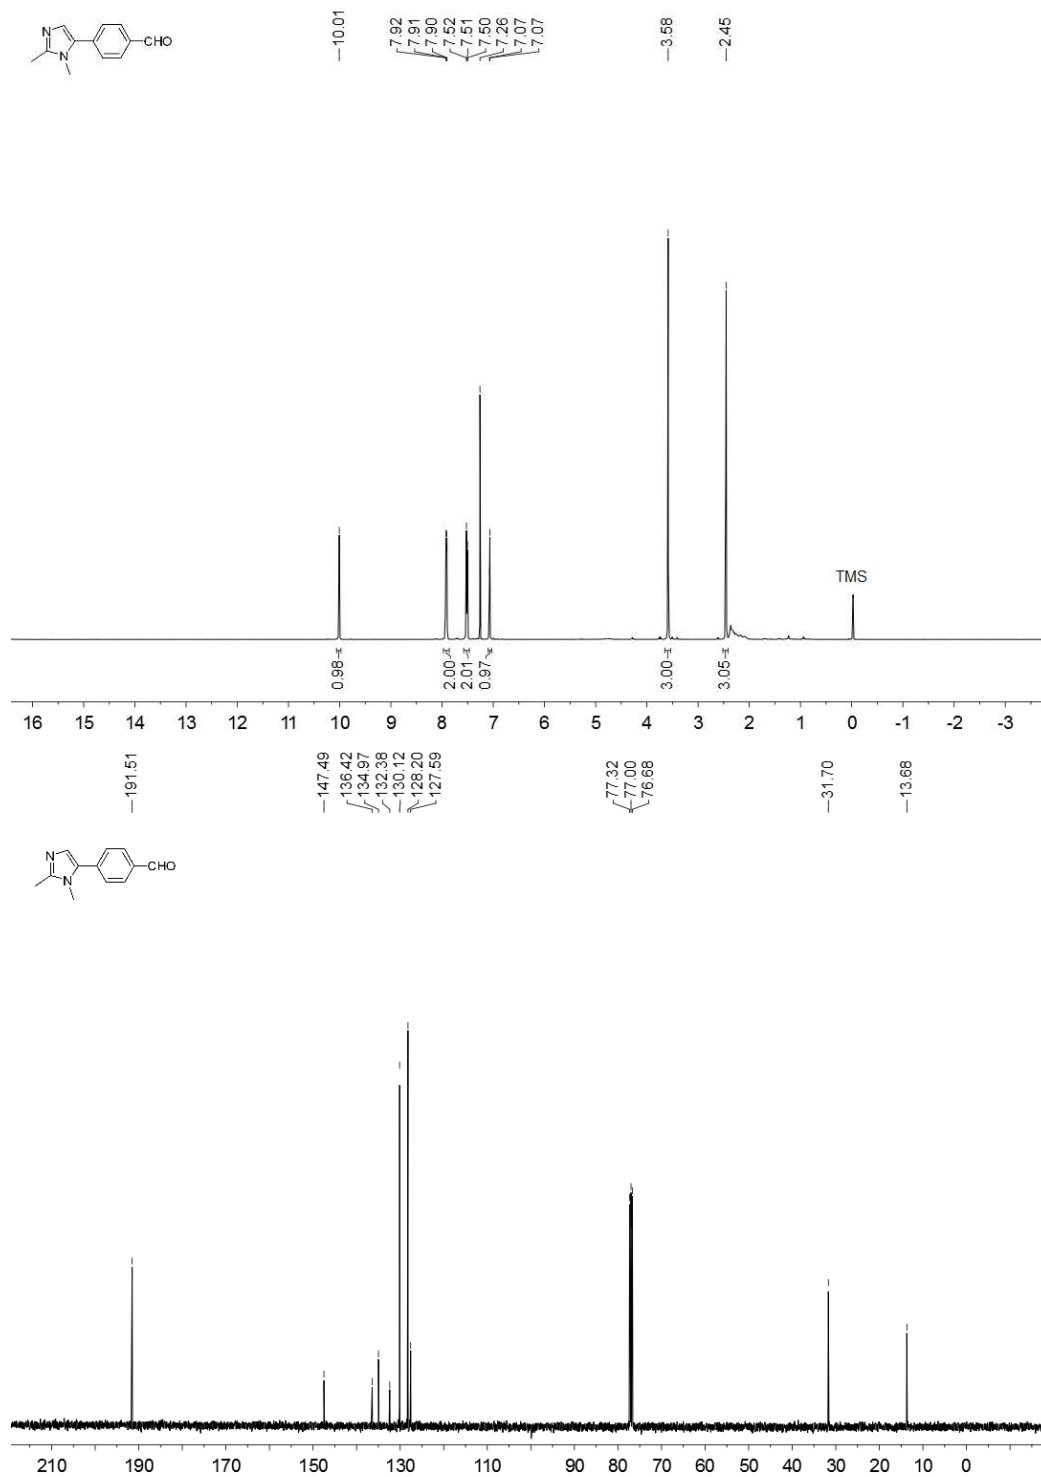

Figure S29. The NMR spectra of 1-(4-(1,2-dimethyl-1H-imidazol-5-yl)phenyl)ethanone (**9bf**)

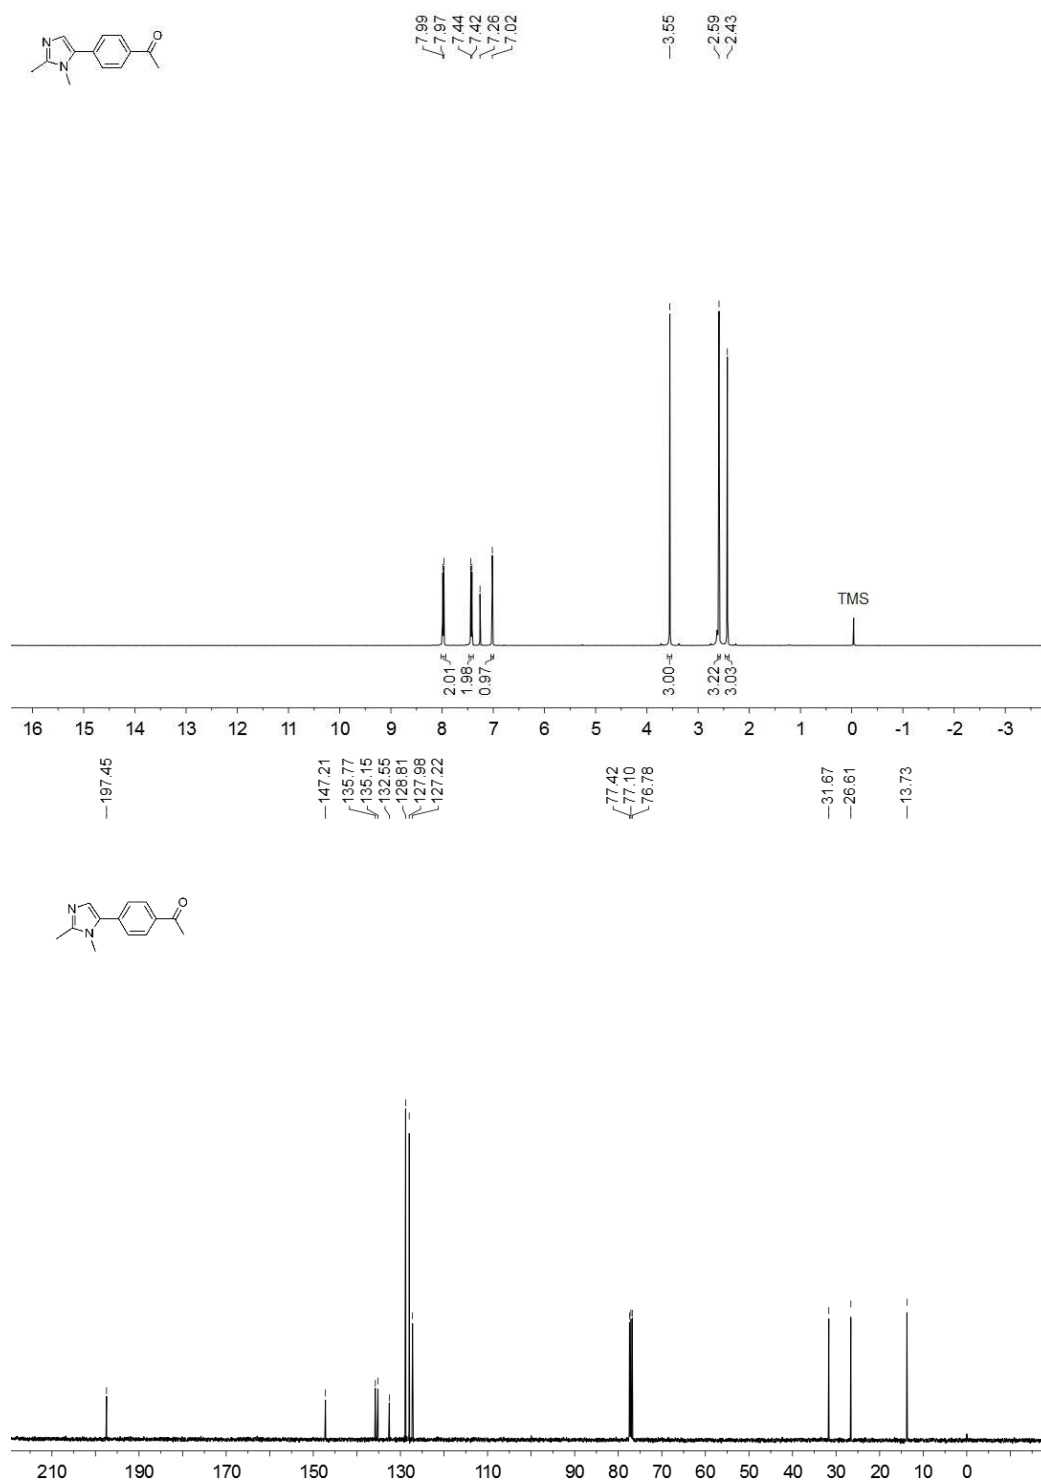

Figure S30. The NMR spectra of 1,2-dimethyl-5-(4-(trifluoromethyl)phenyl)-1H-imidazole (**9bg**)

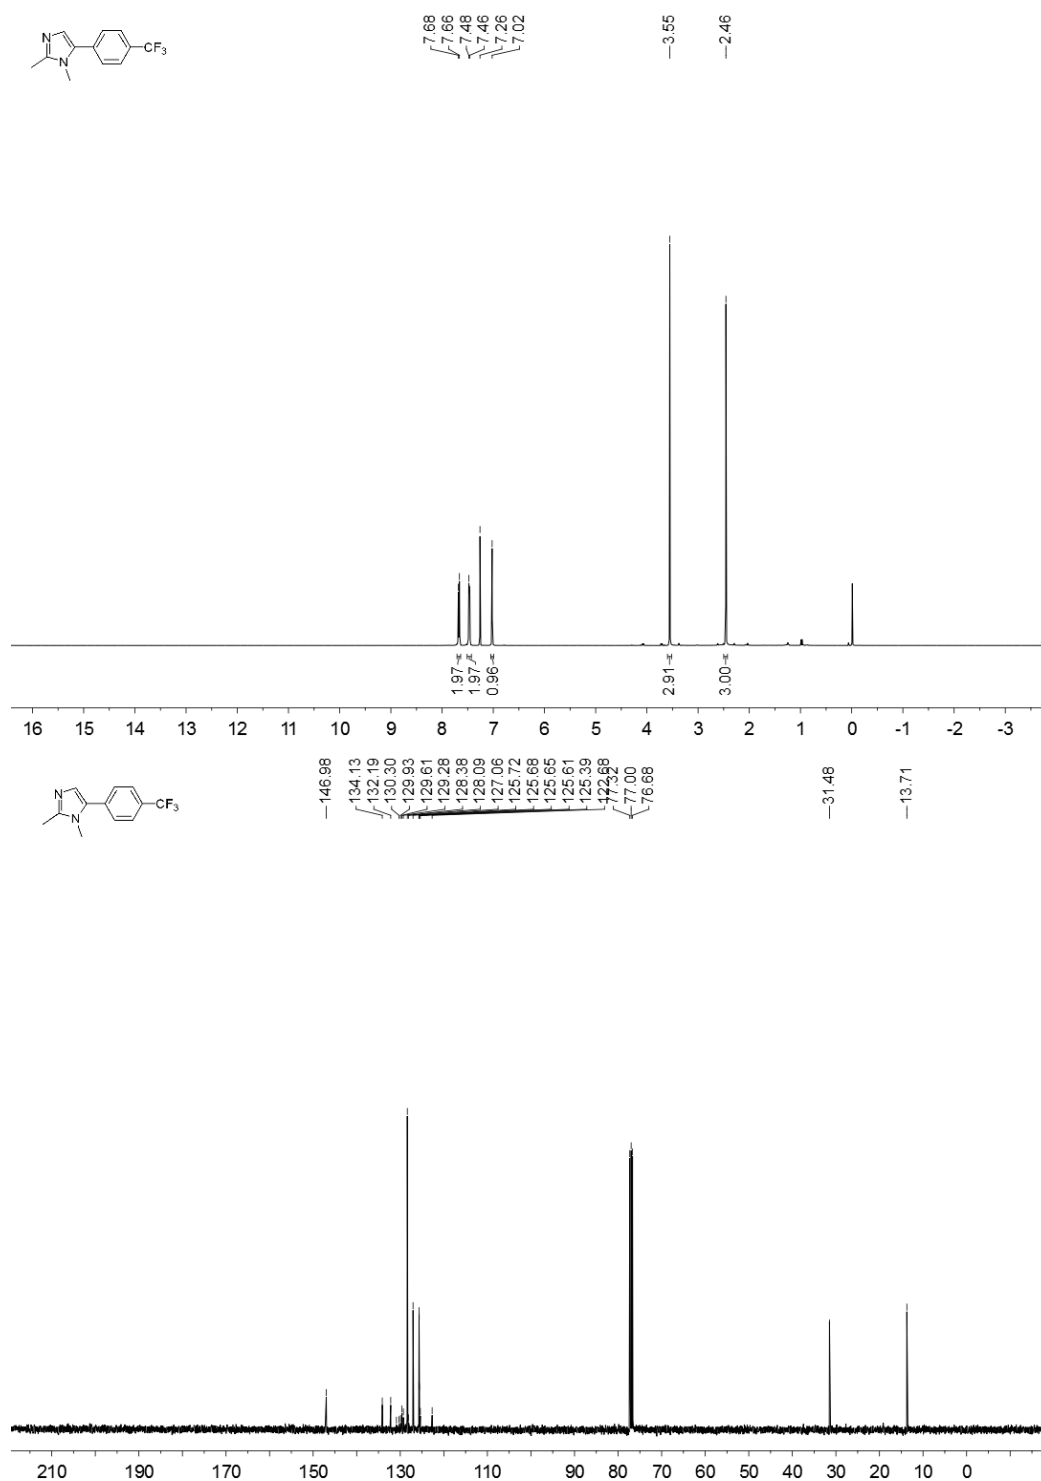

Figure S31. The NMR spectra of 5-(4-fluorophenyl)-1,2-dimethyl-1H-imidazole (**9bh**)

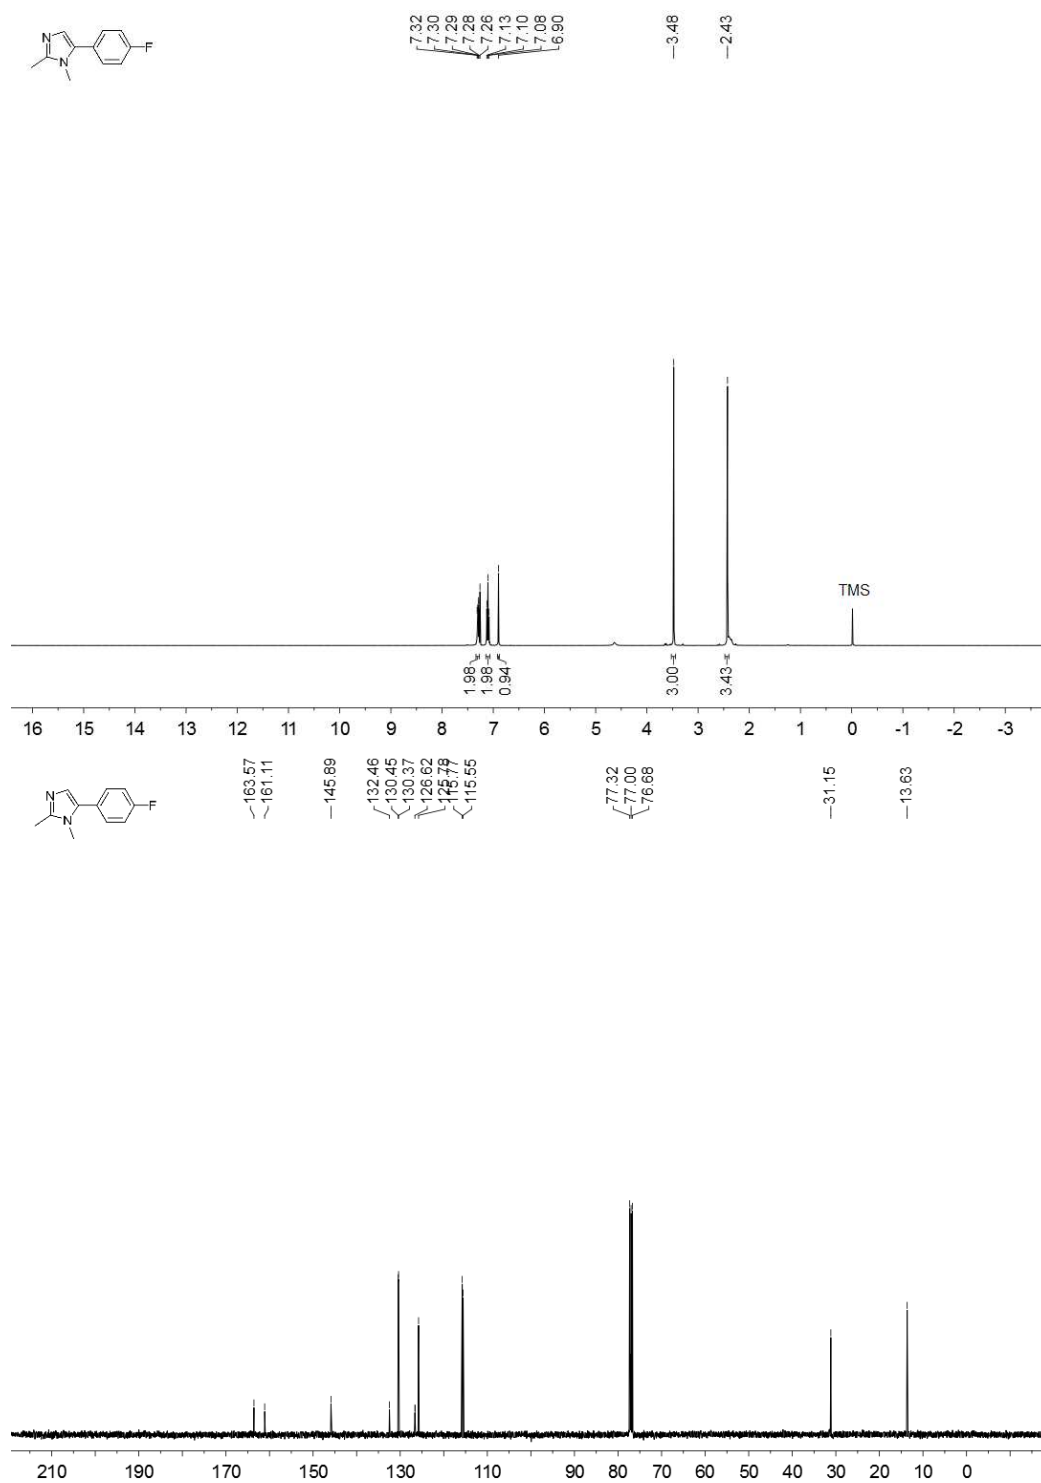

Figure S32. The NMR spectrums of 1,2-dimethyl-5-phenyl-1H-imidazole (**9bi**)

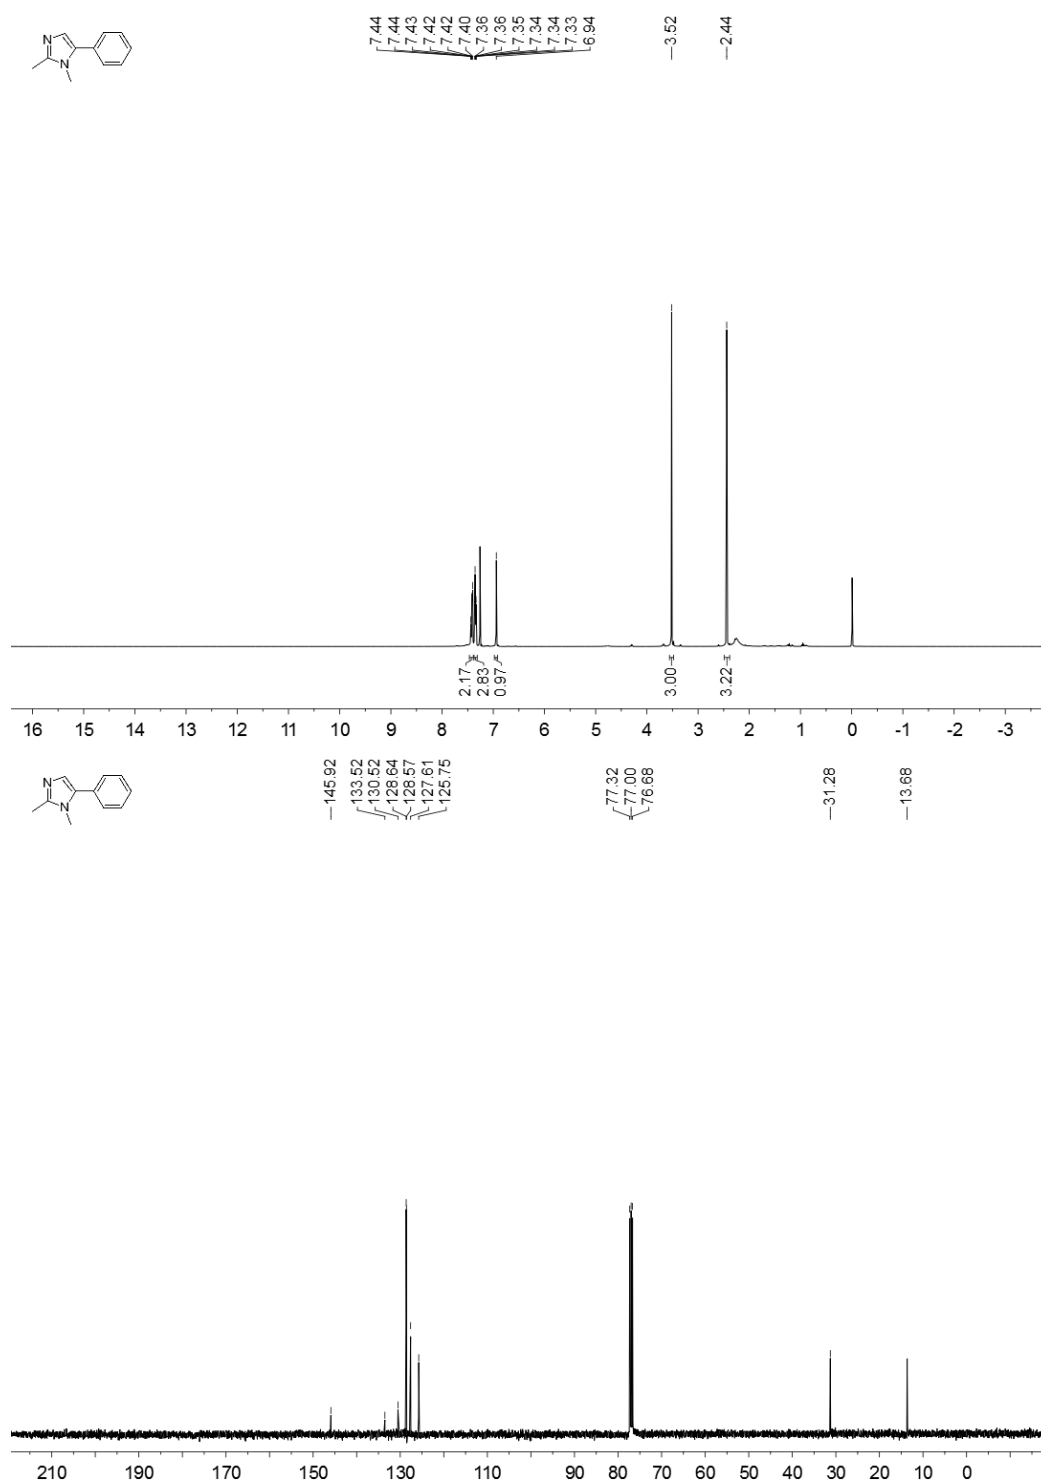

Figure S33. The NMR spectra of 1,2-dimethyl-5-(naphthalen-1-yl)-1H-imidazole (**9bj**)

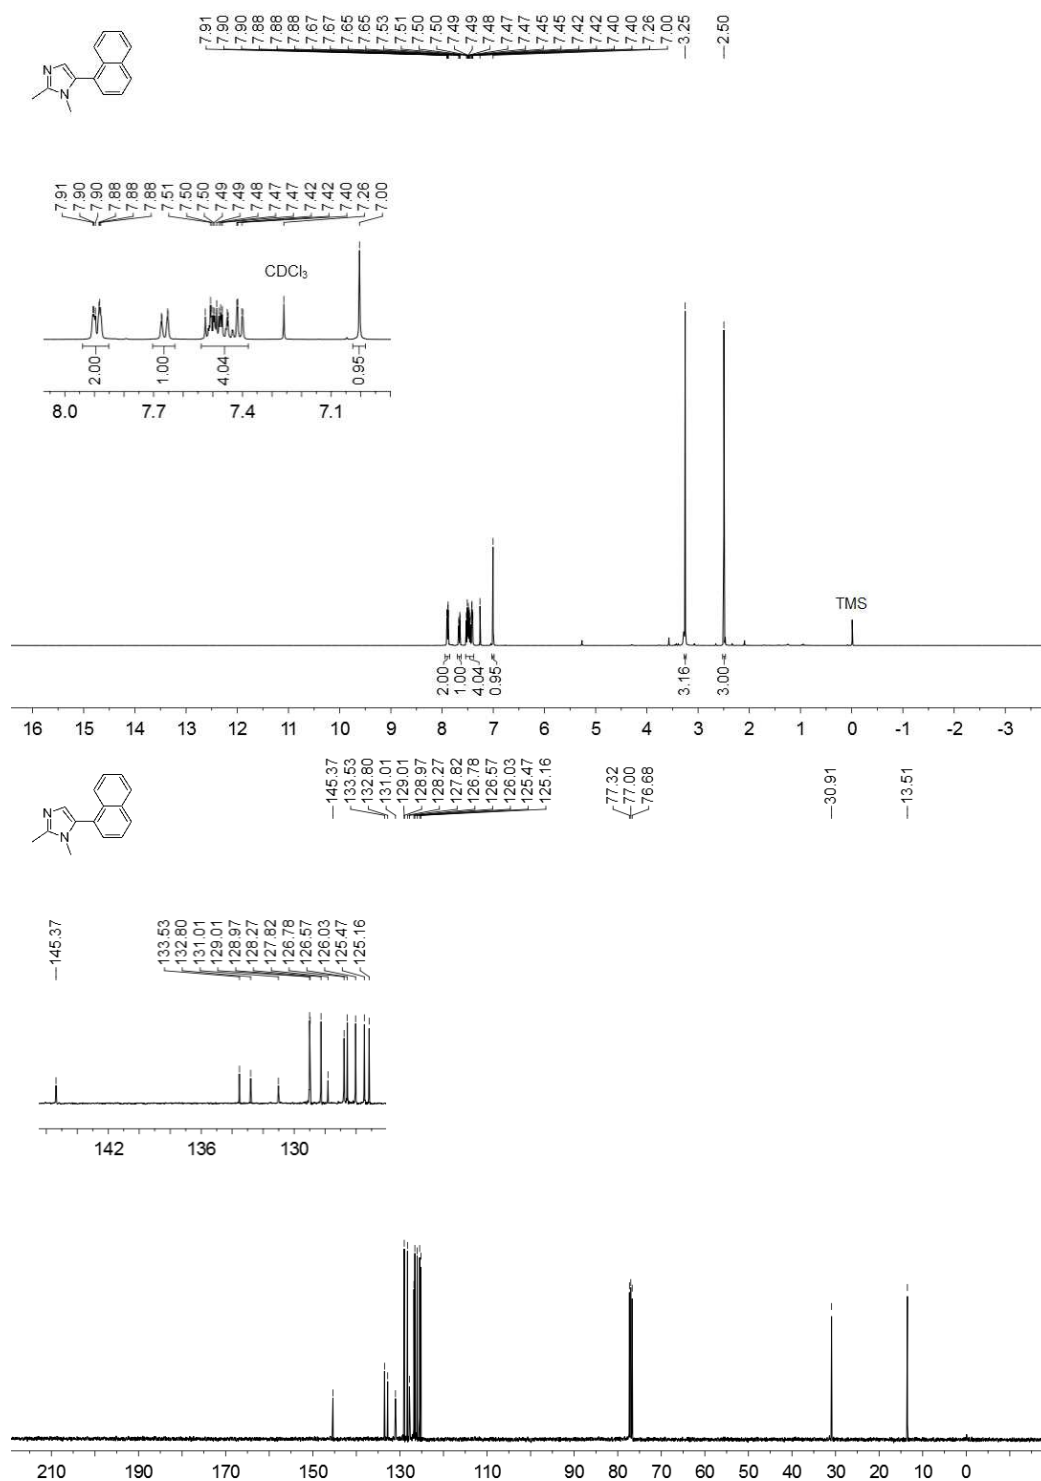

Figure S34. The NMR spectrums of 5-(3-methoxyphenyl)-1,2-dimethyl-1H-imidazole (**9bk**)

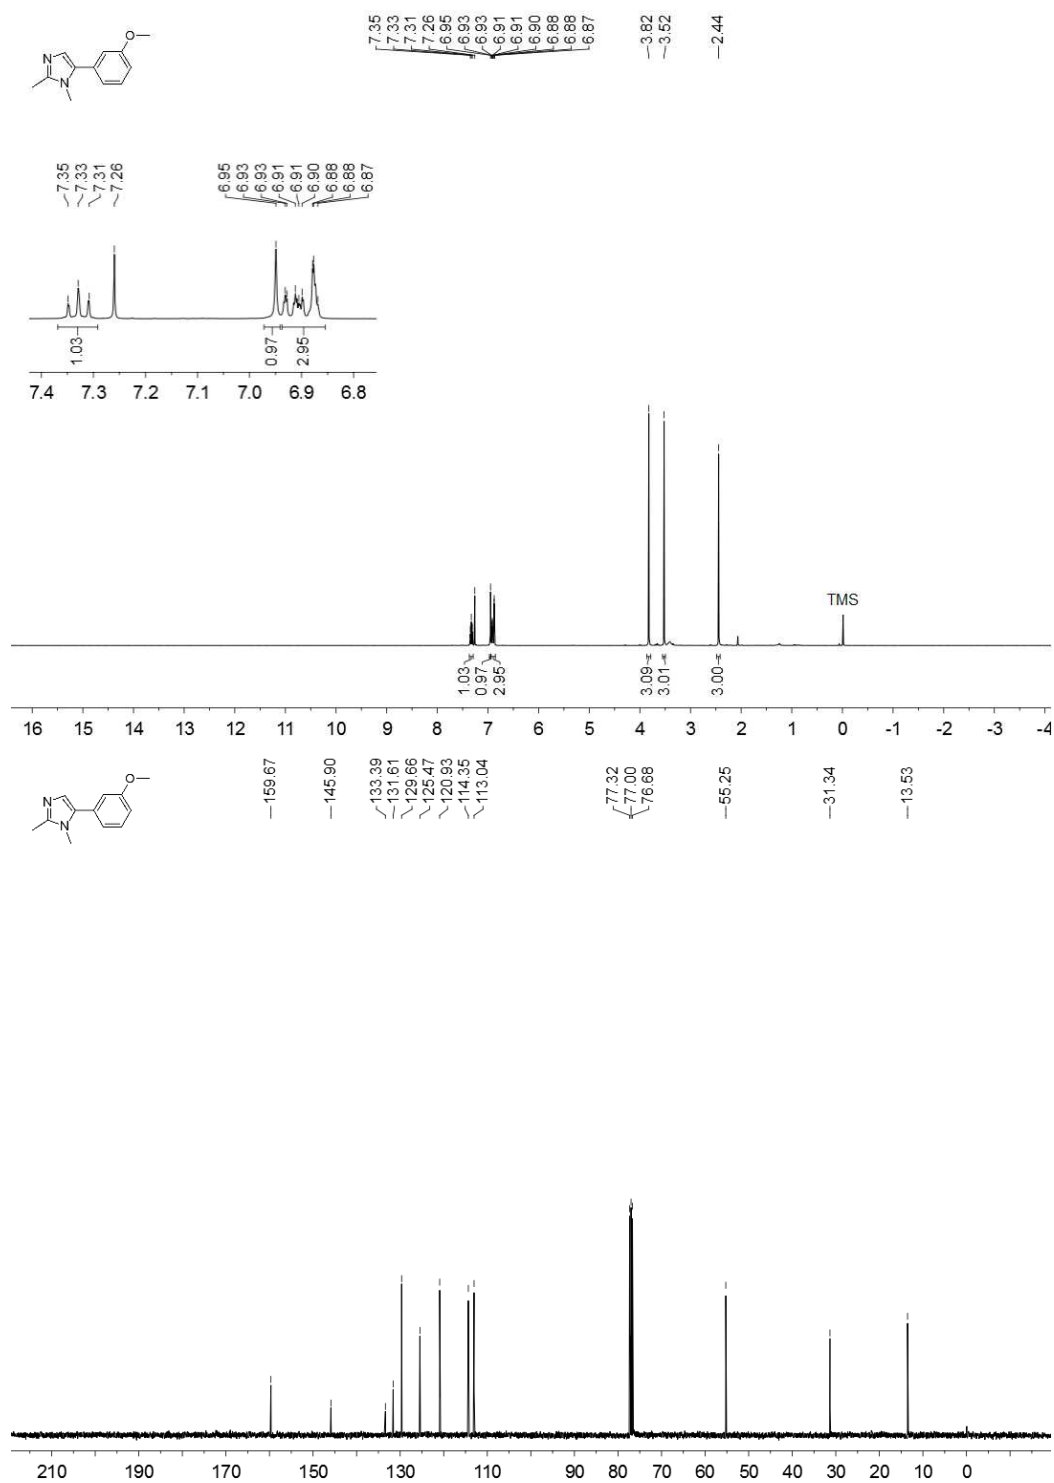



Figure S35. The NMR spectrums of 4-(1,2-dimethyl-1H-imidazol-5-yl)isoquinoline (**9bl**)

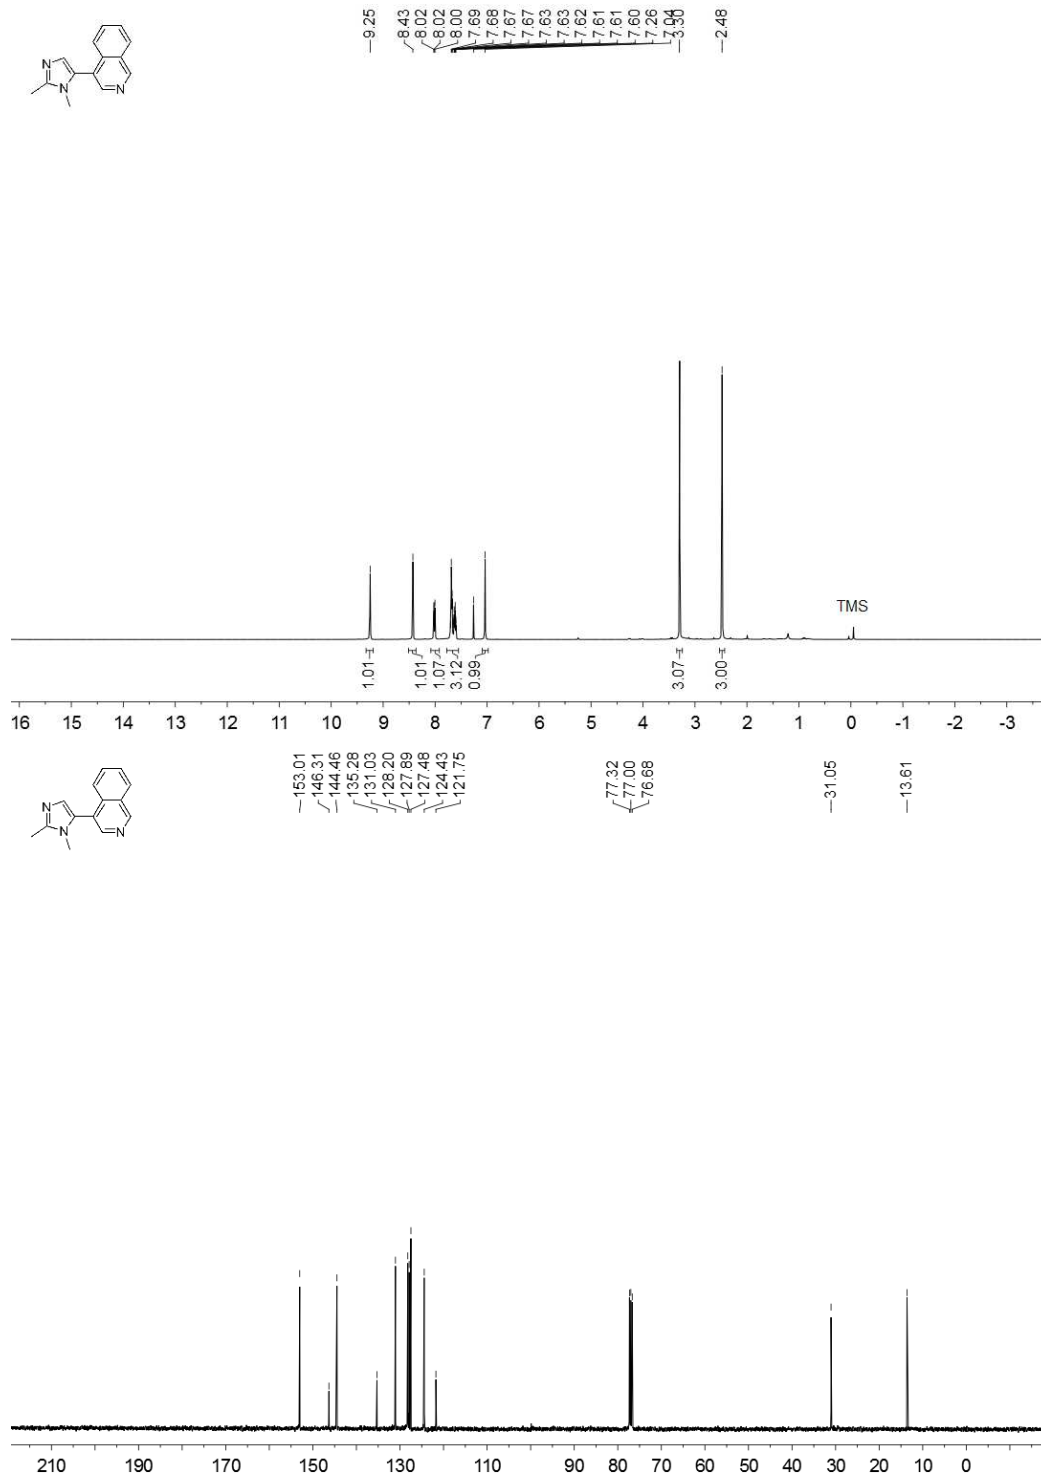

Supplement: Supplementary file 1 [file 5575202]
